# Supplementary material
Source: MDPI journal article supplement (https://www.mdpi.com/1424-2818/16/1/30)
Supplement: s1 [file s1]

## Supplementary Materials

**Table S1.** The resistance phenotypes of the *K. oxytoca* isolates used in this study.

| <i>K. oxytoca</i><br>Strain | Source                         | Resistance to<br>Antibiotic | Tolerance to Heavy Metal | 16S rRNA Gene<br>(GenBank accession no.) |
|-----------------------------|--------------------------------|-----------------------------|--------------------------|------------------------------------------|
| 7-7-27                      | <i>Mytilus edulis</i>          | CHL/SXT/TET                 | Pb                       | OP722748                                 |
| 8-1-12-7                    | <i>Procambarus clarkii</i>     |                             | Cu/Hg/Pb/Zn              | OP722749                                 |
| 8-2-3-6                     | <i>Sinonovacula constricta</i> |                             | Cr/Cu/Hg/Pb/Zn           | OP722753                                 |
| 8-2-11                      | <i>Scapharca subcrenata</i>    | GEN/SXT                     | Cr/Cu/Hg/Mn/Pb/Zn/       | OP740971                                 |
| 8-3-38                      | <i>Arca granosa</i>            | SXT                         | Cr/Cu/Hg/Zn              | OP722750                                 |
| 8-6-19                      | <i>Neptunea cumingi</i> Crosse | CHL/KAN//SXTTET             | Pb                       | OP740972                                 |
| 8-8-40                      | <i>Anodonta woodiana</i>       |                             | Cd/Cr/Cu//Hg/Pb/Zn       | OP722747                                 |
| 8-11-1                      | <i>Carassius auratus</i>       | CIP/NOR/SXT                 | Cd/Cr/Cu/Hg/Zn           | OP722744                                 |

Note: AMP, ampicillin; CHL, chloroamphenicol; KAN, kanamycin; GEN, gentamicin; SXT, sulphamethoxazole-trimethoprim; TET, tetracycline; NOR, norfloxacin; and CIP, ciprofloxacin

**Table S2.** The identified GIs in the *K. oxytoca* genomes.

| <i>K. oxytoca</i><br>Isolate | GI ID | Location   | Scaffold Size | Island Start<br>(bp) | Island End<br>(bp) | Length (bp) | CDS Gene |
|------------------------------|-------|------------|---------------|----------------------|--------------------|-------------|----------|
| 7-7-27                       | GI 01 | Scaffold1  | 520,094       | 347,892              | 386,219            | 38,327      | 57       |
|                              | GI 02 | Scaffold2  | 473,959       | 193,052              | 241,637            | 48,585      | 59       |
|                              | GI 03 | Scaffold2  | 473,959       | 305,451              | 318,466            | 13,015      | 12       |
|                              | GI 04 | Scaffold3  | 451,111       | 398,914              | 412,552            | 13,638      | 13       |
|                              | GI 05 | Scaffold6  | 239,044       | 255,657              | 283,351            | 27,694      | 48       |
|                              | GI 06 | Scaffold10 | 292,463       | 149,099              | 167,899            | 18,800      | 14       |
|                              | GI 07 | Scaffold11 | 180,279       | 3706                 | 9614               | 5908        | 7        |
|                              | GI 08 | Scaffold11 | 180,279       | 87,051               | 98,465             | 11,414      | 12       |
|                              | GI09  | Scaffold14 | 145,961       | 104,637              | 108,364            | 3727        | 7        |
|                              | GI 10 | Scaffold19 | 102,153       | 43,753               | 52,587             | 8834        | 10       |
|                              | GI 11 | Scaffold30 | 62,905        | 18,464               | 32,198             | 13,734      | 20       |
| 8-1-12-7                     | GI 01 | Scaffold1  | 1,054,441     | 386,400              | 482,611            | 96,211      | 93       |
|                              | GI 02 | Scaffold1  | 1,054,441     | 821,835              | 834,966            | 13,131      | 12       |
|                              | GI 03 | Scaffold2  | 733,568       | 333,286              | 355,565            | 22,279      | 23       |
|                              | GI 04 | Scaffold2  | 733,568       | 39,225               | 57,588             | 18,363      | 14       |
|                              | GI 05 | Scaffold2  | 733,568       | 710,009              | 720,968            | 10,959      | 9        |
|                              | GI 06 | Scaffold3  | 547,020       | 482,515              | 523,827            | 41,312      | 43       |
|                              | GI 07 | Scaffold4  | 535,593       | 79,051               | 119,667            | 40,616      | 45       |
|                              | GI 08 | Scaffold6  | 388,884       | 205,364              | 236,681            | 31,317      | 39       |
|                              | GI 09 | Scaffold8  | 269,899       | 164,054              | 167,405            | 3351        | 7        |
|                              | GI 10 | Scaffold10 | 249,141       | 199,441              | 210,603            | 11,162      | 12       |
|                              | GI 11 | Scaffold10 | 249,141       | 33,813               | 38,101             | 4288        | 7        |
|                              | GI 12 | Scaffold10 | 249,141       | 48,260               | 61,666             | 13,406      | 17       |
| 8-2-3-6                      | GI 01 | Scaffold1  | 807,024       | 146,049              | 159,616            | 13,567      | 13       |
|                              | GI 02 | Scaffold1  | 807,024       | 753,988              | 764,532            | 10,544      | 7        |
|                              | GI 03 | Scaffold2  | 788,961       | 447,903              | 456,152            | 8249        | 9        |
|                              | GI 04 | Scaffold2  | 788,961       | 670,367              | 712,904            | 42,537      | 39       |
|                              | GI 05 | Scaffold3  | 510,677       | 439,667              | 458,030            | 18,363      | 13       |
|                              | GI 06 | Scaffold4  | 429,785       | 197,125              | 254,844            | 57,719      | 70       |
|                              | GI 07 | Scaffold4  | 429,785       | 38,699               | 50,285             | 11,586      | 13       |
|                              | GI 08 | Scaffold5  | 417,408       | 22,049               | 75,953             | 53,904      | 52       |
|                              | GI 09 | Scaffold6  | 341,364       | 299,981              | 323,746            | 23,765      | 22       |
|                              | GI 10 | Scaffold11 | 147,734       | 39,007               | 50,124             | 11,117      | 18       |
|                              | GI 11 | Scaffold15 | 118,225       | 87,117               | 96,226             | 9109        | 12       |
|                              | GI 12 | Scaffold22 | 73,600        | 27,618               | 43,327             | 15,709      | 20       |
| 8-2-11                       | GI 01 | Scaffold1  | 987,476       | 870,292              | 895,953            | 25,661      | 25       |
|                              | GI 02 | Scaffold3  | 553,027       | 264,164              | 277,450            | 13,286      | 12       |
|                              | GI 03 | Scaffold3  | 553,027       | 37,035               | 62,096             | 25,061      | 28       |

|        |       |            |           |         |         |        |    |
|--------|-------|------------|-----------|---------|---------|--------|----|
| 8-3-38 | GI 04 | Scaffold4  | 522,457   | 87,570  | 104,314 | 16,744 | 15 |
|        | GI 05 | Scaffold5  | 462,519   | 396,056 | 458,346 | 62,290 | 74 |
|        | GI 06 | Scaffold6  | 429,676   | 26,355  | 36,786  | 10,431 | 11 |
|        | GI 07 | Scaffold7  | 398,542   | 14,771  | 35,584  | 20,813 | 22 |
|        | GI 08 | Scaffold12 | 144,094   | 3186    | 9881    | 6695   | 10 |
|        | GI 09 | Scaffold12 | 144,094   | 45,681  | 52,303  | 6622   | 8  |
|        | GI 10 | Scaffold13 | 131,624   | 3317    | 9015    | 5698   | 9  |
|        | GI 01 | Scaffold1  | 840,808   | 37,853  | 44,976  | 7123   | 7  |
|        | GI 02 | Scaffold1  | 840,808   | 425,205 | 455,353 | 30,148 | 33 |
|        | GI 03 | Scaffold1  | 840,808   | 753,809 | 773,621 | 19,812 | 15 |
|        | GI 04 | Scaffold1  | 840,808   | 822,865 | 836,027 | 13,162 | 8  |
|        | GI 05 | Scaffold2  | 770,426   | 192,865 | 248,409 | 55,544 | 51 |
|        | GI 06 | Scaffold2  | 770,426   | 609,681 | 622,812 | 13,131 | 12 |
|        | GI 07 | Scaffold3  | 553,079   | 221,654 | 226,909 | 5255   | 8  |
|        | GI 08 | Scaffold3  | 553,079   | 428,412 | 473,124 | 44,712 | 45 |
|        | GI 09 | Scaffold4  | 472,626   | 128,821 | 165,957 | 37,136 | 45 |
|        | GI 10 | Scaffold5  | 446,542   | 106,279 | 110,006 | 3727   | 7  |
|        | GI 11 | Scaffold5  | 446,542   | 366,286 | 400,142 | 33,856 | 33 |
|        | GI 12 | Scaffold6  | 341,684   | 313,956 | 321,658 | 7702   | 7  |
| 8-6-19 | GI 13 | Scaffold7  | 323,178   | 222,466 | 231,680 | 9214   | 8  |
|        | GI 14 | Scaffold9  | 238,027   | 32,328  | 71,686  | 39,358 | 44 |
|        | GI 15 | Scaffold11 | 208,678   | 41,974  | 50,769  | 8795   | 10 |
|        | GI 16 | Scaffold11 | 208,678   | 64,042  | 103,328 | 39,286 | 43 |
|        | GI 17 | Scaffold13 | 154,967   | 22,394  | 31,641  | 9247   | 8  |
|        | GI 18 | Scaffold14 | 135,941   | 107,838 | 115,787 | 7949   | 7  |
|        | GI 19 | Scaffold21 | 42,879    | 14,209  | 21,303  | 7094   | 7  |
|        | GI 01 | Scaffold1  | 1,217,762 | 22,388  | 41,107  | 18,719 | 13 |
|        | GI 02 | Scaffold2  | 695,742   | 261,195 | 270,730 | 9535   | 10 |
|        | GI 03 | Scaffold2  | 695,742   | 353,291 | 357,459 | 4168   | 7  |
|        | GI 04 | Scaffold2  | 695,742   | 583,125 | 586,453 | 3328   | 7  |
|        | GI 05 | Scaffold3  | 561,796   | 101,660 | 116,895 | 15,235 | 13 |
|        | GI 06 | Scaffold4  | 358,056   | 285,623 | 307,827 | 22,204 | 22 |
|        | GI 07 | Scaffold5  | 310,479   | 145,961 | 160,174 | 14,213 | 18 |
|        | GI 08 | Scaffold5  | 310,479   | 166,592 | 171,912 | 5320   | 9  |
|        | GI 09 | Scaffold5  | 310,479   | 182,312 | 216,334 | 34,022 | 46 |
|        | GI 10 | Scaffold10 | 198,750   | 34,043  | 50,943  | 16,900 | 14 |
|        | GI 11 | Scaffold11 | 181,804   | 160,667 | 167,773 | 7106   | 9  |
|        | GI 12 | Scaffold13 | 127,030   | 20,780  | 34,910  | 14,130 | 14 |
| 8-8-40 | GI 13 | Scaffold14 | 123,506   | 51,048  | 68,320  | 17,272 | 27 |
|        | GI 14 | Scaffold19 | 99906     | 55,911  | 65,445  | 9534   | 9  |
|        | GI 15 | Scaffold22 | 40,571    | 22,240  | 30,258  | 8018   | 7  |
|        | GI 01 | Scaffold1  | 1,053,471 | 383,413 | 482,649 | 99,236 | 95 |
|        | GI 02 | Scaffold1  | 1,053,471 | 821,135 | 834,266 | 13,131 | 12 |
|        | GI 03 | Scaffold2  | 548,207   | 483,759 | 526,036 | 42,277 | 44 |
|        | GI 04 | Scaffold3  | 535,862   | 417,880 | 455,057 | 37,177 | 42 |
|        | GI 05 | Scaffold4  | 468,019   | 110,676 | 144,365 | 33,689 | 32 |
|        | GI 06 | Scaffold4  | 468,019   | 409,931 | 428,731 | 18,800 | 14 |
|        | GI 07 | Scaffold6  | 390,032   | 206,278 | 237,595 | 31,317 | 39 |
|        | GI 08 | Scaffold7  | 386,668   | 310,882 | 366,174 | 55,292 | 43 |
|        | GI 09 | Scaffold8  | 271,254   | 103,564 | 107,291 | 3727   | 7  |
|        | GI 10 | Scaffold10 | 264,208   | 10,504  | 23,597  | 13,093 | 12 |
| 8-11-1 | GI 11 | Scaffold11 | 249,017   | 199,425 | 210,587 | 11,162 | 12 |
|        | GI 12 | Scaffold11 | 249,017   | 33,797  | 38,085  | 4288   | 7  |
|        | GI 13 | Scaffold11 | 249,017   | 48,244  | 61,650  | 13,406 | 17 |
|        | GI 01 | Scaffold1  | 926,696   | 364,156 | 449,647 | 85,491 | 81 |
|        | GI 02 | Scaffold1  | 926,696   | 909,348 | 924,025 | 14,677 | 27 |
|        | GI 03 | Scaffold2  | 821,235   | 20,090  | 90,382  | 70,292 | 70 |
|        | GI 04 | Scaffold2  | 821,235   | 714,962 | 718,313 | 3351   | 7  |
|        | GI 05 | Scaffold3  | 747,238   | 20,003  | 31,032  | 11,029 | 9  |
|        | GI 06 | Scaffold3  | 747,238   | 383,114 | 402,788 | 19,674 | 20 |

---

|       |            |         |         |         |        |    |
|-------|------------|---------|---------|---------|--------|----|
| GI 07 | Scaffold3  | 747,238 | 673,912 | 707,930 | 34,018 | 27 |
| GI 08 | Scaffold4  | 614,239 | 305,147 | 314,560 | 9413   | 9  |
| GI 09 | Scaffold4  | 614,239 | 76,978  | 121,355 | 44,377 | 39 |
| GI 10 | Scaffold5  | 483,960 | 431,854 | 447,111 | 15,257 | 16 |
| GI 11 | Scaffold6  | 352,655 | 18111   | 44,631  | 26,520 | 28 |
| GI 12 | Scaffold9  | 215,320 | 636     | 8357    | 7721   | 10 |
| GI 13 | Scaffold11 | 167,733 | 150,991 | 165,277 | 14,286 | 23 |

---

**Table S3.** The predicted genes in the identified Gis in the *K. oxytoca* genomes. (see a single EXCEL Table S3)

**Table S4.** The identified prophages in the *K. oxytoca* genomes.

| <i>K. oxytoca</i><br>Isolate | Prophage<br>ID | Location   | Scaffold<br>Size | Start (bp) | End (bp) | Length(bp) | Possible Phage                      | NCBI Accession No. |
|------------------------------|----------------|------------|------------------|------------|----------|------------|-------------------------------------|--------------------|
| 7-7-27                       | Ph 01          | Scaffold24 | 81,635           | 11,731     | 55,626   | 43,896     | <i>Burkholderia</i> _phage_BcepC6B  | NC_005887          |
|                              | Ph 02          | Scaffold2  | 473,959          | 197,230    | 231,478  | 34,249     | <i>Enterobacteria</i> _phage_HK97   | NC_002167          |
|                              | Ph 03          | Scaffold30 | 62,905           | 15,654     | 49,317   | 33,664     | <i>Enterobacteria</i> _phage_PsP3   | NC_005340          |
|                              | Ph 04          | Scaffold10 | 216,741          | 150,094    | 169,091  | 18,998     | <i>Klebsiella</i> _phage_phiKO2     | NC_005857          |
|                              | Ph 05          | Scaffold1  | 520,094          | 208,127    | 251,227  | 43,101     | Phage_phiO18P                       | NC_009542          |
|                              | Ph 06          | Scaffold1  | 520,094          | 353,529    | 385,948  | 32,420     | <i>Haemophilus</i> _phage_Aaphi23   | NC_004827          |
| 8-1-12-7                     | Ph 01          | Scaffold2  | 733,568          | 38,037     | 57,030   | 18,994     | <i>Klebsiella</i> _phage_phiKO2     | NC_005857          |
|                              | Ph 02          | Scaffold6  | 388,884          | 207,207    | 234,256  | 27,050     | <i>Enterobacteria</i> _phage_ES18   | NC_006949          |
|                              | Ph 03          | Scaffold10 | 249,141          | 35,090     | 82,597   | 47,508     | <i>Pseudomonas</i> _phage_phiCTX    | NC_003278          |
| 8-2-3-6                      | Ph 01          | Scaffold3  | 510,677          | 440,225    | 459,222  | 18,998     | <i>Klebsiella</i> _phage_phiKO2     | NC_005857          |
| 8-2-11                       | Ph 01          | Scaffold3  | 553,027          | 37,035     | 70,410   | 33,376     | <i>Enterobacteria</i> _phage_P2     | NC_001895          |
| 8-3-38                       | Ph 01          | Scaffold11 | 208,678          | 73,113     | 128,625  | 55,513     | <i>Pseudomonas</i> _phage_D3        | NC_002484          |
|                              | Ph 02          | Scaffold9  | 238,027          | 36,939     | 71,686   | 34,748     | <i>Pseudomonas</i> _phage_phiCTX    | NC_003278          |
|                              | Ph 03          | Scaffold1  | 840,808          | 756,564    | 803,173  | 46,610     | <i>Klebsiella</i> _phage_phiKO2     | NC_005857          |
|                              | Ph 04          | Scaffold4  | 472,626          | 135,942    | 176,177  | 40,236     | <i>Enterobacteria</i> _phage_ST64B  | NC_004313          |
| 8-6-19                       | Ph 01          | Scaffold5  | 310,479          | 145,961    | 173,799  | 27,839     | Phage_phiO18P                       | NC_009542          |
|                              | Ph 02          | Scaffold14 | 123,506          | 40,596     | 98,895   | 58,300     | <i>Enterobacteria</i> _phage_HK022  | NC_002166          |
| 8-8-40                       | Ph 01          | Scaffold6  | 390,032          | 208,121    | 235,170  | 27,050     | <i>Enterobacteria</i> _phage_ES18   | NC_006949          |
|                              | Ph 02          | Scaffold11 | 249,017          | 35,074     | 82,581   | 47,508     | <i>Pseudomonas</i> _phage_phiCTX    | NC_003278          |
|                              | Ph 03          | Scaffold4  | 468,019          | 410,926    | 429,919  | 18,994     | <i>Klebsiella</i> _phage_phiKO2     | NC_005857          |
| 8-11-1                       | Ph 01          | Scaffold2  | 821,235          | 27,366     | 68,685   | 41,320     | <i>Enterobacteria</i> _phage_SfV    | NC_003444          |
|                              | Ph 02          | Scaffold11 | 167,733          | 150,991    | 167,656  | 16,666     | <i>Pseudomonas</i> _phage_F10       | NC_007805          |
|                              | Ph 03          | Scaffold1  | 926,696          | 910,697    | 926,694  | 15,998     | <i>Enterobacteria</i> _phage_phiP27 | NC_003356          |
|                              | Ph 04          | Scaffold3  | 747,238          | 676,512    | 709,118  | 32,607     | <i>Klebsiella</i> _phage_phiKO2     | NC_005857          |

**Table S5.** The predicted genes in the identified prophages in the *K. oxytoca* genomes. (see a single EXCEL Table S5).

**Table S6.** The identified INs in the *K. oxytoca* genomes.

| <i>K. oxytoca</i><br>Isolate | IN ID | Location   | Scaffold<br>Size (bp) | Length (bp) | Start (bp) | End (bp) | CDS<br>Gene |
|------------------------------|-------|------------|-----------------------|-------------|------------|----------|-------------|
| 7-7-27                       | IN 01 | Scaffold66 | 2227                  | 1809        | 1          | 1810     | 1           |
| 8-6-19                       | IN 01 | Scaffold37 | 3040                  | 3365        | 2905       | 6270     | 4           |

**Table S7.** The identified ISs in the *K. oxytoca* genomes.

| <i>K. oxytoca</i><br>Isolate | IS ID | Location   | Scaffold<br>Size (bp) | Start<br>(bp) | End<br>(bp) | IS Family |
|------------------------------|-------|------------|-----------------------|---------------|-------------|-----------|
| 7-7-27                       | IS1   | Scaffold1  | 520,094               | 236,156       | 237,574     | IS91      |
|                              | IS2   | Scaffold1  | 520,094               | 496,787       | 497,702     | IS91      |
|                              | IS3   | Scaffold42 | 16,375                | 15,002        | 15,765      | IS1       |
|                              | IS4   | Scaffold44 | 15,984                | 3477          | 4604        | IS5       |
|                              | IS5   | Scaffold44 | 15,984                | 8054          | 8823        | IS1       |
|                              | IS6   | Scaffold51 | 8452                  | 177           | 1422        | IS30      |
|                              | IS7   | Scaffold55 | 6457                  | 175           | 1395        | IS3       |
| 8-2-11                       | IS1   | Scaffold7  | 398,542               | 393,390       | 394,504     | IS91      |
|                              | IS2   | Scaffold7  | 398,542               | 394,705       | 395,687     | IS91      |
| 8-1-12-7                     | IS1   | Scaffold2  | 733,568               | 712,518       | 713,434     | IS91      |
| 8-3-38                       | IS1   | Scaffold8  | 240,513               | 47,690        | 48804       | IS5       |
| 8-6-19                       | IS1   | Scaffold2  | 695,742               | 260,796       | 261,964     | IS91      |
|                              | IS2   | Scaffold5  | 310,479               | 172,739       | 173,813     | IS91      |
|                              | IS3   | Scaffold32 | 7741                  | 6499          | 7262        | IS1       |
|                              | IS4   | Scaffold43 | 1464                  | 28            | 1268        | IS110     |
| 8-8-40                       | IS1   | Scaffold7  | 386,668               | 356,988       | 357,582     | IS66      |

**Table S8.** The putative virulence-related genes identified in the *K. oxytoca* genomes.

| Virulence-Related Gene | <i>K. oxytoca</i> Genome                                          | Reference |
|------------------------|-------------------------------------------------------------------|-----------|
| <i>acpXL</i>           | 7-7-27, 8-1-12-7, 8-2-3-6, 8-2-11, 8-3-38, 8-6-19, 8-8-40, 8-11-1 | [1]       |
| <i>acrAB</i>           | 7-7-27, 8-1-12-7, 8-2-3-6, 8-2-11, 8-3-38, 8-6-19, 8-8-40, 8-11-1 | [2]       |
| <i>adeG</i>            | 7-7-27, 8-1-12-7, 8-2-3-6, 8-2-11, 8-3-38, 8-6-19, 8-8-40, 8-11-1 | [3]       |
| <i>algU</i>            | 7-7-27, 8-1-12-7, 8-2-3-6, 8-2-11, 8-3-38, 8-6-19, 8-8-40, 8-11-1 | [4]       |
| <i>allABCDRS</i>       | 8-2-11, 8-6-19                                                    | [5]       |
| <i>chuS</i>            | 7-7-27, 8-1-12-7, 8-2-3-6, 8-2-11, 8-3-38, 8-6-19, 8-8-40, 8-11-1 | [6]       |
| <i>clpP</i>            | 7-7-27, 8-1-12-7, 8-2-3-6, 8-2-11, 8-3-38, 8-6-19, 8-8-40, 8-11-1 | [7]       |
| <i>clpV/tssH</i>       | 7-7-27, 8-1-12-7, 8-3-38, 8-6-19, 8-8-40                          | [8]       |
| <i>csrA</i>            | 7-7-27, 8-1-12-7, 8-2-3-6, 8-2-11, 8-3-38, 8-6-19, 8-8-40, 8-11-1 | [9]       |
| <i>dotU/tssL</i>       | 8-3-38                                                            | [10]      |
| <i>entABCDEFs</i>      | 7-7-27, 8-1-12-7, 8-2-3-6, 8-2-11, 8-3-38, 8-6-19, 8-8-40, 8-11-1 | [11]      |
| <i>exeDEG</i>          | 7-7-27, 8-1-12-7, 8-2-3-6, 8-2-11, 8-3-38, 8-6-19, 8-8-40, 8-11-1 | [12]      |
| <i>fepABCDG</i>        | 7-7-27, 8-1-12-7, 8-2-3-6, 8-2-11, 8-3-38, 8-6-19, 8-8-40, 8-11-1 | [11]      |
| <i>fimABCDEFGHl</i>    | 7-7-27, 8-1-12-7, 8-2-3-6, 8-2-11, 8-3-38, 8-6-19, 8-8-40, 8-11-1 | [13]      |
| <i>fur</i>             | 7-7-27, 8-1-12-7, 8-2-3-6, 8-2-11, 8-3-38, 8-6-19, 8-8-40, 8-11-1 | [14]      |
| <i>fyuA</i>            | 7-7-27, 8-1-12-7, 8-2-3-6, 8-2-11, 8-3-38, 8-6-19, 8-8-40, 8-11-1 | [15]      |
| <i>galFU</i>           | 7-7-27, 8-1-12-7, 8-2-3-6, 8-2-11, 8-3-38, 8-6-19, 8-8-40, 8-11-1 | [16, 17]  |
| <i>gmhA/lpcA</i>       | 7-7-27, 8-1-12-7, 8-2-3-6, 8-2-11, 8-3-38, 8-6-19, 8-8-40, 8-11-1 | [18]      |
| <i>gndA</i>            | 7-7-27, 8-1-12-7, 8-2-3-6, 8-2-11, 8-3-38, 8-6-19, 8-8-40, 8-11-1 | [19]      |
| <i>hcp/tssD</i>        | 7-7-27, 8-1-12-7, 8-2-3-6, 8-2-11, 8-3-38, 8-6-19, 8-8-40, 8-11-1 | [20]      |
| <i>htpB</i>            | 7-7-27, 8-1-12-7, 8-2-3-6, 8-2-11, 8-3-38, 8-6-19, 8-8-40, 8-11-1 | [21]      |

|                    |                                                                   |      |
|--------------------|-------------------------------------------------------------------|------|
| <i>icmF/tssM</i>   | 7-7-27, 8-1-12-7, 8-3-38, 8-6-19, 8-8-40, 8-11-1                  | [22] |
| <i>IlpA</i>        | 7-7-27, 8-1-12-7, 8-2-3-6, 8-2-11, 8-3-38, 8-6-19, 8-8-40, 8-11-1 | [23] |
| <i>impA/tssA</i>   | 7-7-27, 8-1-12-7, 8-2-3-6, 8-2-11, 8-3-38, 8-6-19, 8-8-40, 8-11-1 | [22] |
| <i>irp12</i>       | 7-7-27, 8-1-12-7, 8-2-3-6, 8-2-11, 8-3-38, 8-6-19, 8-8-40, 8-11-1 | [24] |
| <i>iutA</i>        | 7-7-27, 8-1-12-7, 8-2-3-6, 8-2-11, 8-3-38, 8-6-19, 8-8-40, 8-11-1 | [25] |
| <i>katA</i>        | 7-7-27, 8-1-12-7, 8-2-3-6, 8-2-11, 8-3-38, 8-6-19, 8-8-40, 8-11-1 | [26] |
| <i>kdsA</i>        | 7-7-27, 8-1-12-7, 8-2-3-6, 8-2-11, 8-3-38, 8-6-19, 8-8-40, 8-11-1 | [27] |
| <i>lpxABCD</i>     | 7-7-27, 8-1-12-7, 8-2-3-6, 8-2-11, 8-3-38, 8-6-19, 8-8-40, 8-11-1 | [28] |
| <i>luxS</i>        | 7-7-27, 8-1-12-7, 8-2-3-6, 8-2-11, 8-3-38, 8-6-19, 8-8-40, 8-11-1 | [29] |
| <i>mgtBC</i>       | 7-7-27, 8-1-12-7, 8-2-3-6, 8-2-11, 8-3-38, 8-6-19, 8-8-40, 8-11-1 | [30] |
| <i>mrkABCDHFJ</i>  | 7-7-27, 8-1-12-7, 8-2-3-6, 8-2-11, 8-3-38, 8-6-19, 8-8-40, 8-11-1 | [31] |
| <i>msbA</i>        | 7-7-27, 8-1-12-7, 8-2-3-6, 8-2-11, 8-3-38, 8-6-19, 8-8-40, 8-11-1 | [32] |
| <i>ompA</i>        | 7-7-27, 8-1-12-7, 8-2-3-6, 8-2-11, 8-3-38, 8-6-19, 8-8-40, 8-11-1 | [33] |
| <i>phoPQ</i>       | 7-7-27, 8-1-12-7, 8-2-3-6, 8-2-11, 8-3-38, 8-6-19, 8-8-40, 8-11-1 | [34] |
| <i>rcsAB</i>       | 7-7-27, 8-1-12-7, 8-2-3-6, 8-2-11, 8-3-38, 8-6-19, 8-8-40, 8-11-1 | [35] |
| <i>rfaDEF</i>      | 7-7-27, 8-1-12-7, 8-2-3-6, 8-2-11, 8-3-38, 8-6-19, 8-8-40, 8-11-1 | [36] |
| <i>rfbABDK1</i>    | 7-7-27, 8-1-12-7, 8-2-3-6, 8-2-11, 8-3-38, 8-8-40, 8-11-1         | [37] |
| <i>rffG</i>        | 7-7-27, 8-1-12-7, 8-2-3-6, 8-2-11, 8-3-38, 8-6-19, 8-8-40, 8-11-1 | [38] |
| <i>rpoS</i>        | 7-7-27, 8-1-12-7, 8-2-3-6, 8-2-11, 8-3-38, 8-6-19, 8-8-40, 8-11-1 | [39] |
| <i>sciN/tssJ</i>   | 8-3-38, 8-11-1                                                    | [40] |
| <i>sodB</i>        | 7-7-27, 8-1-12-7, 8-2-3-6, 8-2-11, 8-3-38, 8-6-19, 8-8-40, 8-11-1 | [41] |
| <i>tssFG</i>       | 7-7-27, 8-1-12-7, 8-2-3-6, 8-3-38, 8-6-19, 8-8-40, 8-11-1         | [42] |
| <i>tufA</i>        | 7-7-27, 8-1-12-7, 8-2-3-6, 8-2-11, 8-3-38, 8-6-19, 8-8-40, 8-11-1 | [43] |
| <i>ureA</i>        | 8-2-11                                                            | [44] |
| <i>ureBG</i>       | 7-7-27, 8-1-12-7, 8-2-3-6, 8-2-11, 8-3-38, 8-6-19, 8-8-40, 8-11-1 | [44] |
| <i>vasE/tssK</i>   | 7-7-27, 8-1-12-7, 8-2-3-6, 8-2-11, 8-3-38, 8-6-19, 8-8-40, 8-11-1 | [22] |
| <i>vfr</i>         | 7-7-27, 8-1-12-7, 8-2-3-6, 8-2-11, 8-3-38, 8-6-19, 8-8-40, 8-11-1 | [45] |
| <i>vgrG/tssI</i>   | 8-1-12-7, 8-3-38, 8-6-19, 8-8-40, 8-11-1                          | [20] |
| <i>vipA/tssB</i>   | 7-7-27, 8-2-3-6, 8-2-11, 8-3-38, 8-6-19, 8-8-40, 8-11-1           | [46] |
| <i>vipB/tssC</i>   | 7-7-27, 8-1-12-7, 8-2-3-6, 8-8-38, 8-6-19, 8-8-40, 8-11-1         | [46] |
| <i>wbtL</i>        | 7-7-27, 8-1-12-7, 8-2-3-6, 8-2-11, 8-3-38, 8-6-19, 8-8-40, 8-11-1 | [47] |
| <i>yagV/lecP</i>   | 7-7-27, 8-1-12-7, 8-2-3-6, 8-2-11, 8-3-38, 8-6-19, 8-8-40, 8-11-1 | [48] |
| <i>yagW/lecP</i>   | 7-7-27, 8-1-12-7, 8-2-3-6, 8-2-11, 8-3-38, 8-6-19, 8-8-40, 8-11-1 | [49] |
| <i>yagY/lecP</i>   | 7-7-27, 8-1-12-7, 8-2-3-6, 8-2-11, 8-3-38, 8-6-19, 8-8-40, 8-11-1 | [50] |
| <i>yagZ/lecP</i>   | 7-7-27, 8-1-12-7, 8-2-3-6, 8-2-11, 8-3-38, 8-6-19, 8-8-40, 8-11-1 | [51] |
| <i>ybtAEPQSTUX</i> | 7-7-27, 8-1-12-7, 8-2-3-6, 8-2-11, 8-3-38, 8-6-19, 8-8-40, 8-11-1 | [52] |
| <i>ykgK/lecP</i>   | 7-7-27, 8-1-12-7, 8-2-3-6, 8-2-11, 8-3-38, 8-6-19, 8-8-40, 8-11-1 | [53] |

**Table S9.** The putative antibiotic and heavy metal resistance-related genes identified in the *K. oxytoca* genomes.

| Antimicrobial Agent | Resistance-Related Genes | <i>K. oxytoca</i> Genome                                          | Reference |
|---------------------|--------------------------|-------------------------------------------------------------------|-----------|
| Aminoglycoside      | <i>aada</i>              | 8-6-19                                                            | [54]      |
| Aminoglycoside      | <i>aph3-I</i>            | 7-7-27, 8-1-12-7, 8-2-3-6, 8-2-11, 8-3-38, 8-6-19, 8-8-40, 8-11-1 | [55]      |
| Aminoglycoside      | <i>msbA</i>              | 7-7-27, 8-1-12-7, 8-2-3-6, 8-2-11, 8-3-38, 8-6-19, 8-8-40, 8-11-1 | [56]      |
| Aminoglycoside      | <i>strA</i>              | 7-7-27                                                            | [57]      |
| Aminoglycoside      | <i>strB</i>              | 7-7-27, 8-6-19                                                    | [58]      |
| Aminoglycoside      | <i>tuf</i>               | 7-7-27, 8-2-11, 8-1-12-7, 8-11-1                                  | [59]      |
| Aminoglycosides     | <i>sdiA</i>              | 7-7-27, 8-1-12-7, 8-2-3-6, 8-2-11, 8-3-38, 8-6-19, 8-8-40, 8-11-1 | [60]      |
| Carbapenem          | <i>lamB</i>              | 7-7-27, 8-2-11, 8-1-12-7, 8-11-1                                  | [61]      |
| Carbapenem          | <i>phoE</i>              | 7-7-27, 8-1-12-7, 8-2-3-6, 8-2-11, 8-3-38, 8-6-19, 8-8-40, 8-11-1 | [62]      |
| Carbapenem          | <i>ptsI</i>              | 7-7-27, 8-2-11, 8-1-12-7, 8-11-1                                  | [63]      |
| Fosfomycin          |                          |                                                                   |           |
| Cephalosporin       | <i>ebr</i>               | 8-6-19                                                            | [64]      |
| Carbapenem          |                          |                                                                   |           |
| Cephalosporin       | <i>ftsI</i>              | 7-7-27, 8-2-11, 8-1-12-7, 8-11-1                                  | [65]      |

|                |                 |                                                                   |       |
|----------------|-----------------|-------------------------------------------------------------------|-------|
| β-lactam       |                 |                                                                   |       |
| Cephalosporin  | <i>ompF</i>     | 8-2-11,8-1-12-7,8-11-1                                            | [66]  |
| β-lactam       |                 |                                                                   |       |
| Quinolone      |                 |                                                                   |       |
| Colistin       | <i>eptA</i>     | 7-7-27, 8-1-12-7, 8-2-3-6, 8-2-11, 8-3-38, 8-6-19, 8-8-40, 8-11-1 | [67]  |
| Colistin       | <i>eptB</i>     | 7-7-27,8-2-11,8-1-12-7,8-11-1                                     | [67]  |
| Colistin       | <i>mldDF</i>    | 7-7-27,8-2-11,8-1-12-7,8-11-1                                     | [68]  |
| Colistin       | <i>phoPQ</i>    | 7-7-27,8-2-11,8-1-12-7,8-11-1                                     | [69]  |
| Colistin       | <i>ugd</i>      | 7-7-27, 8-1-12-7, 8-2-3-6, 8-2-11, 8-3-38, 8-6-19, 8-8-40, 8-11-1 | [70]  |
| Fosfomycin     | <i>fosA5</i>    | 7-7-27, 8-1-12-7, 8-2-3-6, 8-2-11, 8-3-38, 8-6-19, 8-8-40, 8-11-1 | [71]  |
| Fosfomycin     | <i>glpT</i>     | 7-7-27,8-2-11,8-1-12-7,8-11-1                                     | [72]  |
| Fosfomycin     | <i>murA</i>     | 7-7-27,8-2-11,8-1-12-7,8-11-1                                     | [73]  |
| β-lactam       | <i>lptD</i>     | 7-7-27,8-2-11,8-1-12-7,8-11-1                                     | [74]  |
| Macrolide      | <i>mdfA</i>     | 7-7-27, 8-1-12-7, 8-2-3-6, 8-2-11, 8-3-38, 8-6-19, 8-8-40, 8-11-1 | [75]  |
| Nitrofurantoin | <i>marR</i>     | 7-7-27,8-2-11,8-1-12-7,8-11-1                                     | [76]  |
| Nitrofurantoin | <i>nfsA</i>     | 7-7-27,8-2-11,8-1-12-7,8-11-1                                     | [77]  |
| PAS            | <i>thyA</i>     | 7-7-27,8-2-11,8-1-12-7,8-11-1                                     | [78]  |
| Polymyxin      | <i>arnT</i>     | 7-7-27,8-2-11,8-1-12-7,8-11-1                                     | [79]  |
| Quinolone      | <i>acrR</i>     | 7-7-27,8-2-11,8-1-12-7,8-11-1                                     | [80]  |
| Quinolone      | <i>csrA</i>     | 7-7-27,8-2-11,8-1-12-7,,8-11-1                                    | [81]  |
| Rifamycin      |                 |                                                                   |       |
| Aminoglycoside |                 |                                                                   |       |
| Nitrofurantoin |                 |                                                                   |       |
| Quinolone      | <i>gyrAB</i>    | 7-7-27,8-2-11,8-1-12-7,8-11-1                                     | [82]  |
| Quinolone      | <i>marA</i>     | 7-7-27, 8-1-12-7, 8-2-3-6, 8-2-11, 8-3-38, 8-6-19, 8-8-40, 8-11-1 | [83]  |
| Quinolone      | <i>mcbG</i>     | 7-7-27,8-6-19                                                     | [84]  |
| Quinolone      | <i>oqxAB</i>    | 7-7-27, 8-1-12-7, 8-2-3-6, 8-2-11, 8-3-38, 8-6-19, 8-8-40, 8-11-1 | [85]  |
| Quinolone      | <i>parCE</i>    | 7-7-27,8-2-11,8-1-12-7,8-11-1                                     | [86]  |
| Rifamycin      | <i>mipA</i>     | 7-7-27,8-2-11,8-1-12-7,8-11-1                                     | [87]  |
| Rifamycin      | <i>rpoB</i>     | 7-7-27,8-2-11,8-1-12-7,8-11-1                                     | [88]  |
| streptomycin   | <i>rpsJL</i>    | 7-7-27,8-2-11,8-1-12-7,8-11-1                                     | [89]  |
| Sulfonamide    | <i>dfrA1</i>    | 7-7-27                                                            | [90]  |
| Sulfonamide    | <i>folP</i>     | 7-7-27,8-2-11,8-1-12-7,8-11-1                                     | [91]  |
| Sulfonamide    | <i>leuO</i>     | 7-7-27,8-2-11,8-1-12-7,8-11-1                                     | [92]  |
| tetracycline   | <i>bacA</i>     | 7-7-27, 8-1-12-7, 8-2-3-6, 8-2-11, 8-3-38, 8-6-19, 8-8-40, 8-11-1 | [93]  |
| Tetracycline   | <i>tetA</i>     | 7-7-27,8-6-19                                                     | [94]  |
| Tigecycline    | <i>ramA</i>     | 7-7-27, 8-1-12-7, 8-2-3-6, 8-2-11, 8-3-38, 8-6-19, 8-8-40, 8-11-1 | [95]  |
| Tigecycline    | <i>soxS</i>     | 7-7-27,8-2-11,8-1-12-7,8-11-1                                     | [96]  |
| Colistin       |                 |                                                                   |       |
| Trimethoprim   | <i>dfrA12</i>   | 8-6-19                                                            | [97]  |
| β-lactam       | <i>acrABDEF</i> | 7-7-27, 8-1-12-7, 8-2-3-6, 8-2-11, 8-3-38, 8-6-19, 8-8-40, 8-11-1 | [98]  |
| β-lactam       | <i>ampH</i>     | 8-2-3-6,8-3-38,8-6-19,8-8-40                                      | [99]  |
| β-lactam       | <i>baeRS</i>    | 7-7-27, 8-1-12-7, 8-2-3-6, 8-2-11, 8-3-38, 8-6-19, 8-8-40, 8-11-1 | [100] |
| β-lactam       | <i>blaOXY</i>   | 7-7-27, 8-1-12-7, 8-2-3-6, 8-2-11, 8-3-38, 8-6-19, 8-8-40, 8-11-1 | [101] |
| β-lactam       | <i>blaTEM</i>   | 7-7-27                                                            | [102] |
| β-lactam       | <i>cmlA</i>     | 7-7-27, 8-6-19                                                    | [103] |
| β-lactam       | <i>cpxA</i>     | 7-7-27, 8-1-12-7, 8-2-3-6, 8-2-11, 8-3-38, 8-6-19, 8-8-40, 8-11-1 | [104] |
| β-lactam       | <i>ompCN</i>    | 7-7-27, 8-1-12-7, 8-2-3-6, 8-2-11, 8-3-38, 8-6-19, 8-8-40, 8-11-1 | [105] |
| β-lactam       | <i>tolC</i>     | 7-7-27, 8-1-12-7, 8-2-3-6, 8-2-11, 8-3-38, 8-6-19, 8-8-40, 8-11-1 | [106] |
| Aminoglycoside |                 |                                                                   |       |
| Tetracycline   |                 |                                                                   |       |
| Quinolone      |                 |                                                                   |       |
| Phenicol       |                 |                                                                   |       |
| Macrolide      |                 |                                                                   |       |
| Lincosamide    |                 |                                                                   |       |
| Heavy metal    | <i>kdpE</i>     | 7-7-27, 8-1-12-7, 8-2-3-6, 8-2-11, 8-3-38, 8-6-19, 8-8-40, 8-11-1 | [107] |

**Table S10.** The thirty-four *K. oxytoca* strains with complete genomes used in the phylogenetic tree.

| <i>K. oxytoca</i> Strain | Host         | Collected Date | Serotype | ST  | Location       | GenBank Accession No. |
|--------------------------|--------------|----------------|----------|-----|----------------|-----------------------|
| P620                     | Environment  | 2016           | K58      | -   | China          | NZ_CP046115.1         |
| KONIH4                   | Environment  | 2015           | K68      | 202 | USA            | NZ_CP026269.1         |
| AR380                    | Host missing | -              | O5       | 257 | -              | NZ_CP029128.1         |
| FDAARGOS_1332            | Homo sapiens | -              | O5       | 176 | USA            | NZ_CP069943.1         |
| FDAARGOS_1331            | Homo sapiens | -              | O5       | 176 | USA            | NZ_CP070144.1         |
| KoPF10                   | Homo sapiens | 2018           | O5       | 48  | USA            | NZ_CP072914.1         |
| C-21-18                  | Homo sapiens | 2021           | O5       | 176 | Japan          | NZ_CP093271.1         |
| 2022CK-00498             | Homo sapiens | 2022           | K74      | 285 | USA            | NZ_CP114305.1         |
| 328                      | Homo sapiens | 2018           | O5       | 328 | Spain          | NZ_OW969781.1         |
| CAV1099                  | Homo sapiens | 2009           | K68      | 199 | USA            | NZ_CP011597.1         |
| CAV1335                  | Homo sapiens | 2010           | K68      | 199 | USA            | NZ_CP011618.1         |
| CAV1015                  | Homo sapiens | 2007           | K68      | 199 | USA            | NZ_CP017928.1         |
| AHC-6                    | Homo sapiens | 2004           | K68      | 1   | -              | NZ_CP098757.1         |
| 2022CK-00499             | Homo sapiens | 2022           | K74      | -   | USA            | NZ_CP114308.1         |
| FDAARGOS_1336            | Homo sapiens | -              | K68      | 199 | USA            | NZ_JAFFQV010000001.1  |
| 325                      | Homo sapiens | 2018           | K68      | 325 | Spain          | NZ_OW849470.1         |
| 36                       | Homo sapiens | 2018           | K68      | 36  | Spain          | NZ_OW969659.1         |
| FDAARGOS_335             | Homo sapiens | 2015           | O3       | 222 | USA            | NZ_CP027426.1         |
| RHBSTW-00373             | Environment  | 2017           | K68      | 37  | United Kingdom | NZ_CP056567.1         |
| RHB30-C02                | Environment  | 2017           | O3       | 145 | United Kingdom | NZ_CP057330.1         |
| FDAARGOS_1334            | Homo sapiens | -              | O3       | 201 | USA            | NZ_CP069911.1         |
| KONSF-1                  | Homo sapiens | 2021           | O3       | 245 | Unknown        | NZ_CP090245.1         |
| NMI2990_17               | Homo sapiens | 2017           | O3       | 145 | Poland         | NZ_CP129616.1         |
| 145                      | Homo sapiens | 2018           | O3       | 145 | Spain          | NZ_OW967374.1         |
| FDAARGOS_500             | Homo sapiens | 2018           | O3       | 59  | USA            | NZ_CP033844.1         |
| IR5392                   | Homo sapiens | 2015           | K74      | 34  | China          | NZ_CP064108.1         |
| FDAARGOS_1333            | Homo sapiens | -              | O3       | 302 | USA            | NZ_CP070020.1         |
| TYL-T1                   | Host missing | 2020           | K74      | 2   | China          | NZ_CP107040.1         |
| NCTC11356                | Host missing | 1980           | K74      | 101 | United Kingdom | NZ_LR133932.1         |
| NCTC13727                | Homo sapiens | 2018           | K29      | -   | USA            | NZ_LR134333.1         |
| MSB1_10D                 | Homo sapiens | 2014           | K74      | 266 | Australia      | NZ_LR890312.1         |
| 2                        | Homo sapiens | 2018           | K74      | 2   | Spain          | NZ_OW967518.1         |
| 101                      | Homo sapiens | 2018           | K74      | 101 | Spain          | NZ_OW968280.1         |
| 101                      | Homo sapiens | 2018           | K74      | 101 | Spain          | NZ_OW968347.1         |

-: unknown.



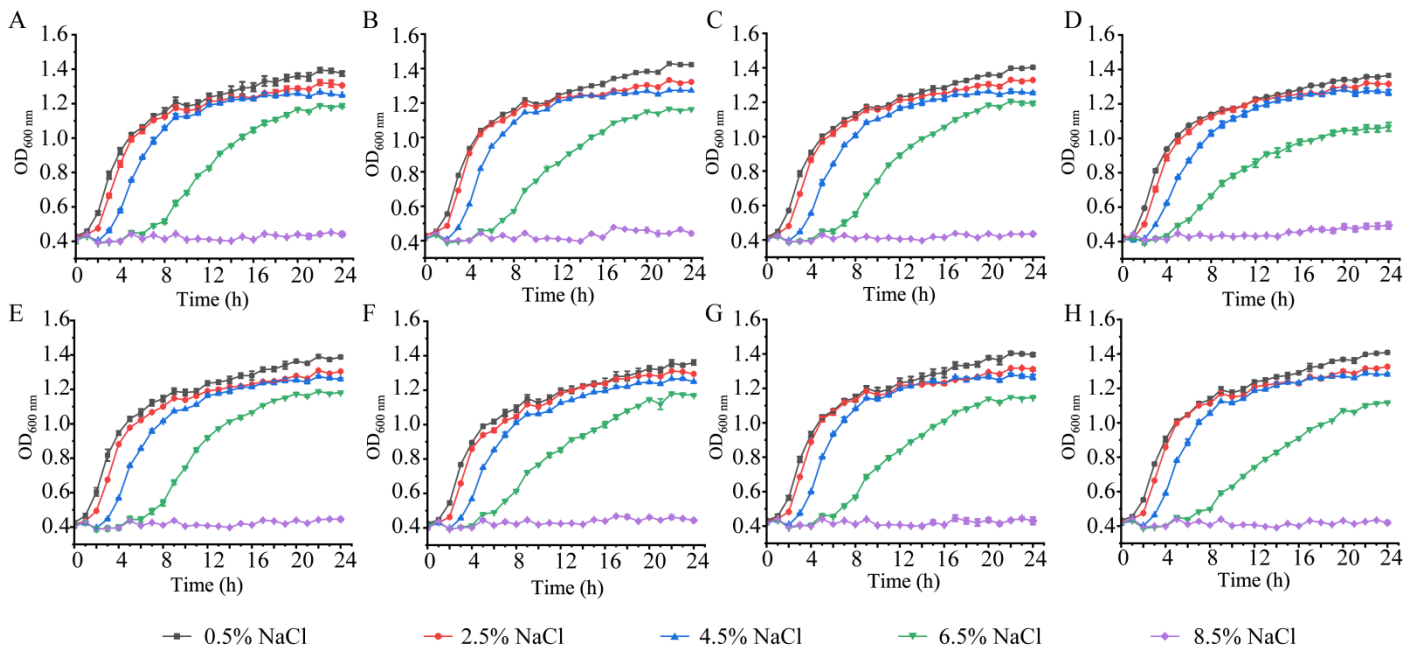

**Figure S1.** Growth curves of the *K. oxytoca* isolates of aquatic animal origins under different concentrations of NaCl conditions. A-H: *K. oxytoca* 7-7-27, 8-1-12-7, 8-2-3-6, 8-2-11, 8-3-38, 8-6-19, 8-8-40 and 8-11-1 isolates were incubated in the TSB (pH 7.2, 0.5–8.5% NaCl) at 37 °C for 24 h, respectively.

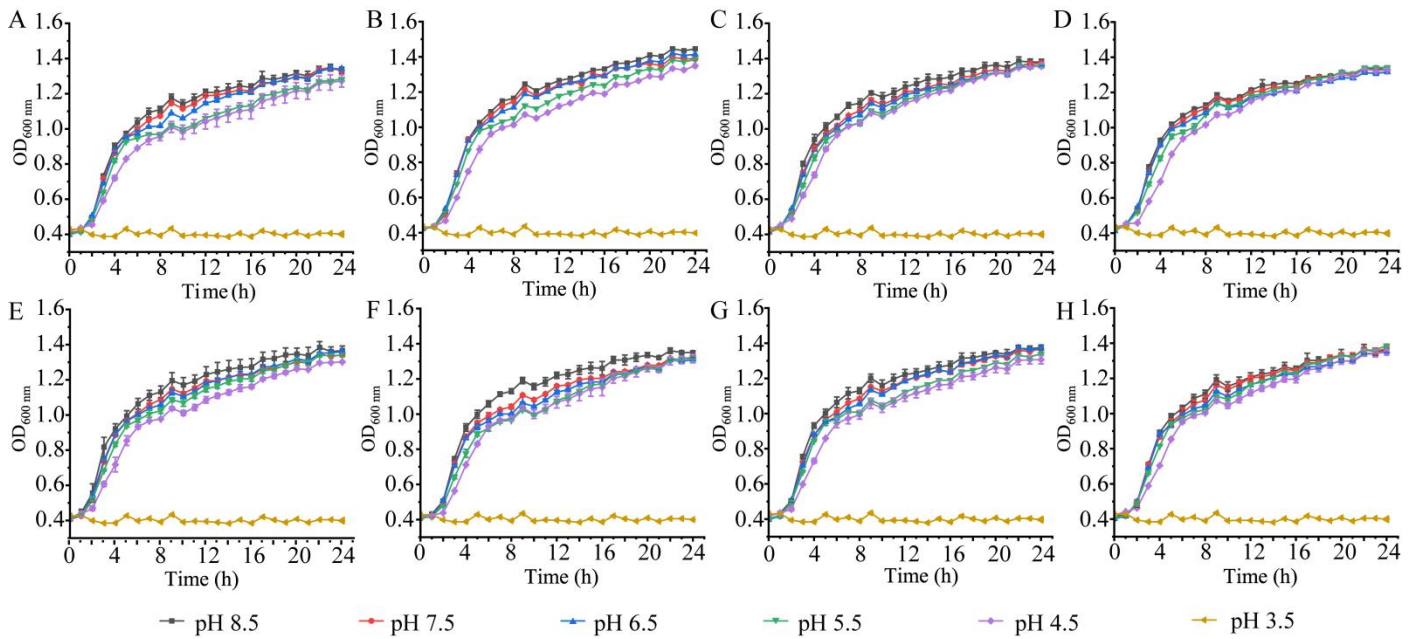

**Figure S2.** Growth curves of the *K. oxytoca* isolates of aquatic animal origins under different pH conditions. A-H: *K. oxytoca* 7-7-27, 8-1-12-7, 8-2-3-6, 8-2-11, 8-3-38, 8-6-19, 8-8-40, and 8-11-1 isolates were incubated in the TSB (0.5% NaCl, pH 3.5–8.5) at 37 °C for 24 h, respectively.

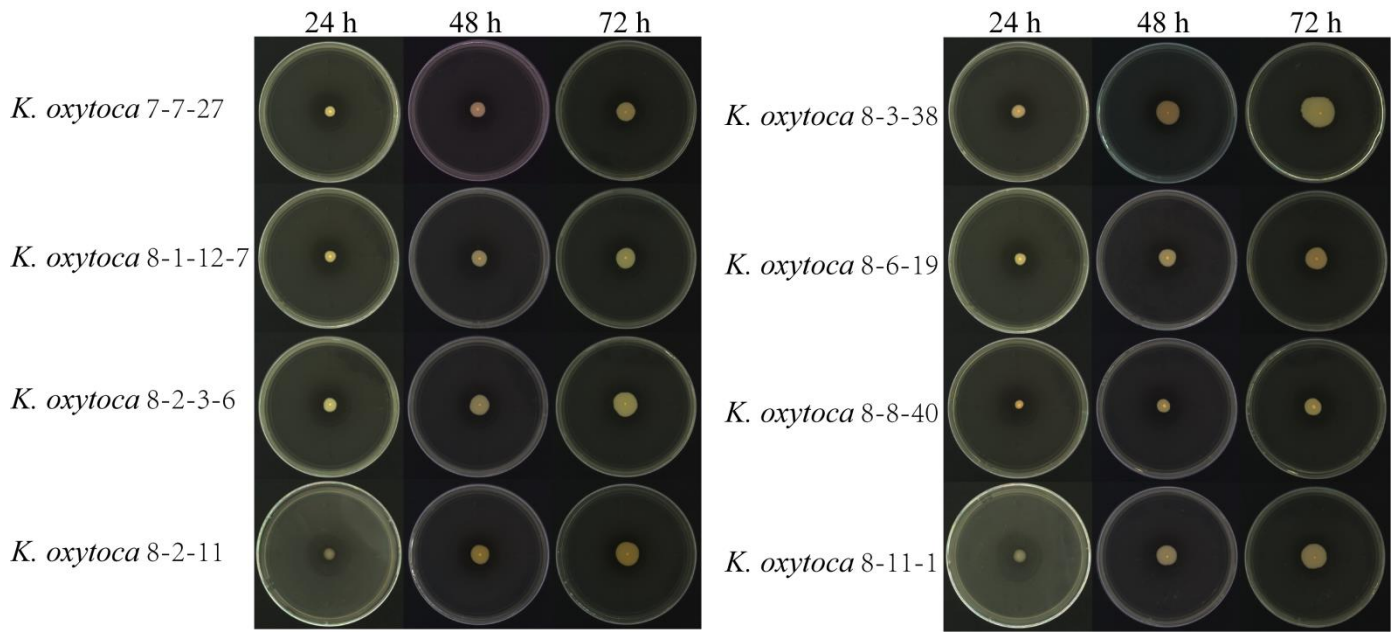

**Figure S3.** The swimming loops of the *K. oxytoca* isolates of aquatic animal origins. The *K. oxytoca* 7-7-27, 8-1-12-7, 8-2-3-6, 8-2-11, 8-3-38, 8-6-19, 8-8-40, and 8-11-1 isolates were incubated in the TSB (0.5% NaCl, pH 8.5, 0.25% agar) at 37 °C for 72 h.

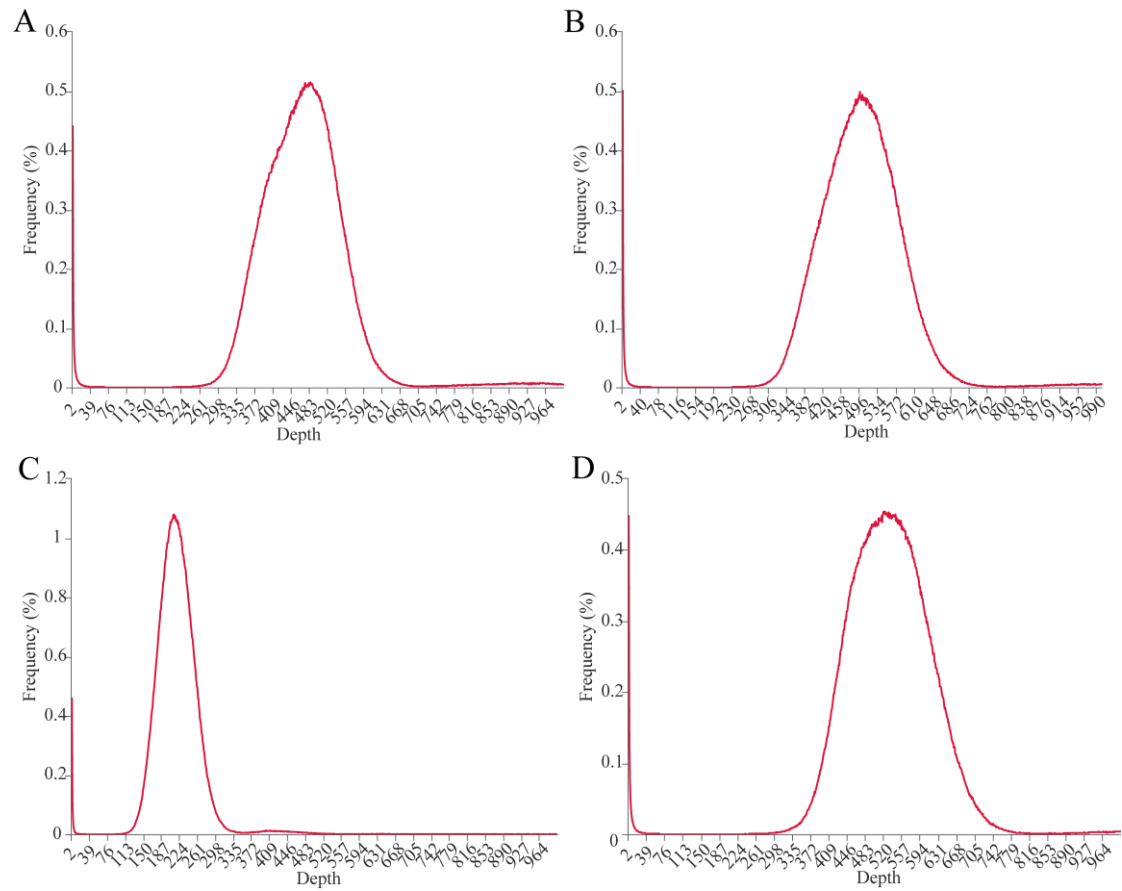

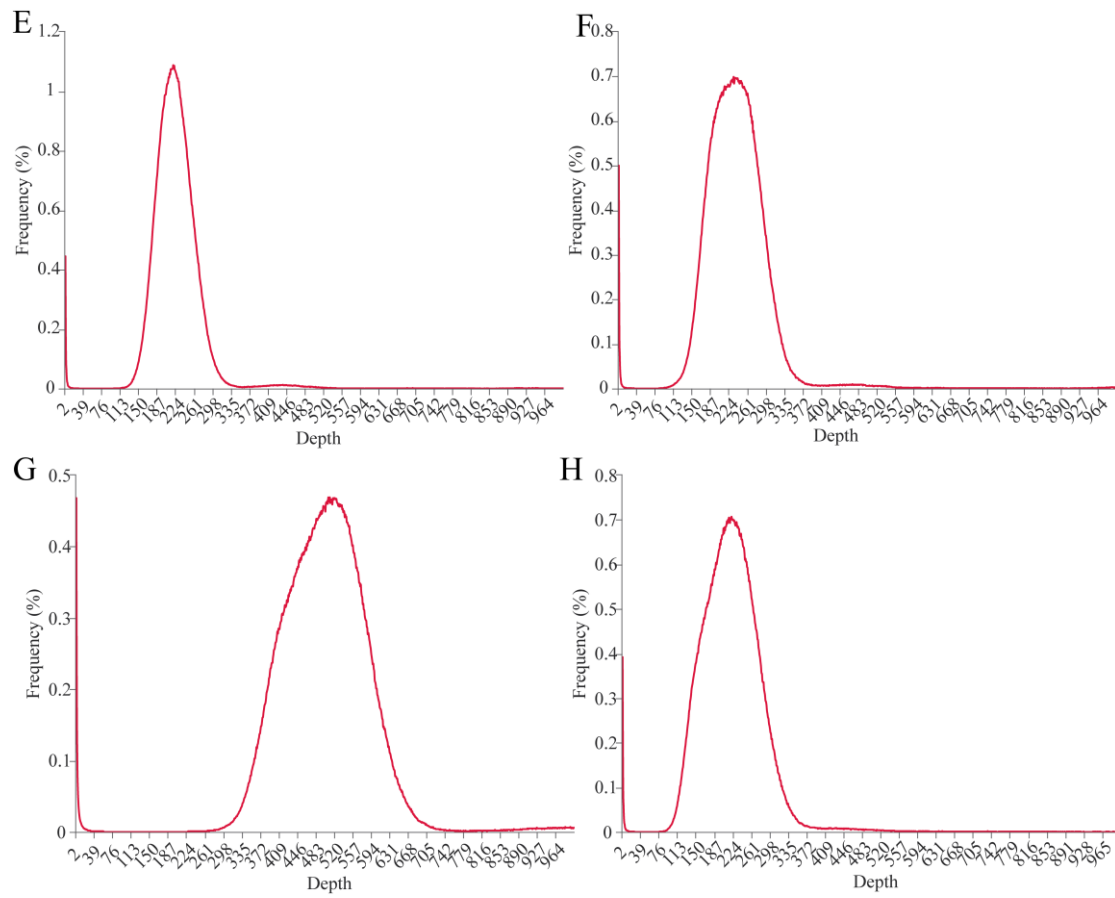

**Figure S4.** The k-mer analysis for *K. oxytoca* sequencing reads based on the number of unique 17-mers. A–H: *K. oxytoca* 7-7-27, 8-1-12-7, 8-2-3-6, 8-2-11, 8-3-38, 8-6-19, 8-8-40, and 8-11-1 genomes, respectively.

**A** *K. oxytoca* 7-7-27

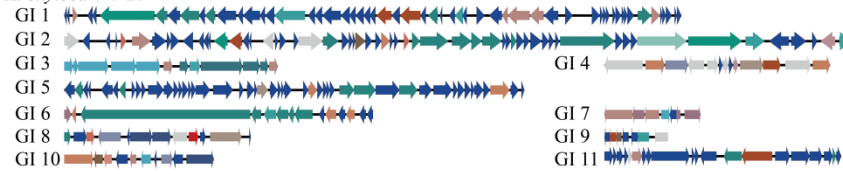

*K. oxytoca* 8-1-12-7

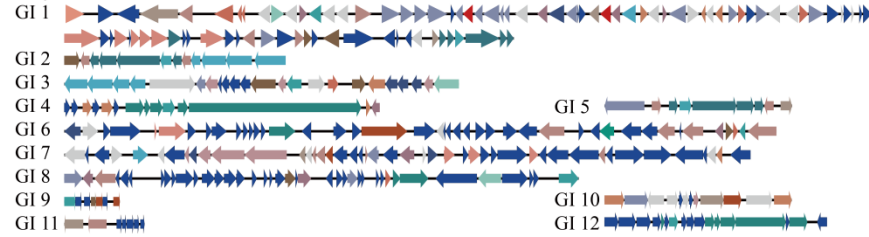

*K. oxytoca* 8-2-3-6

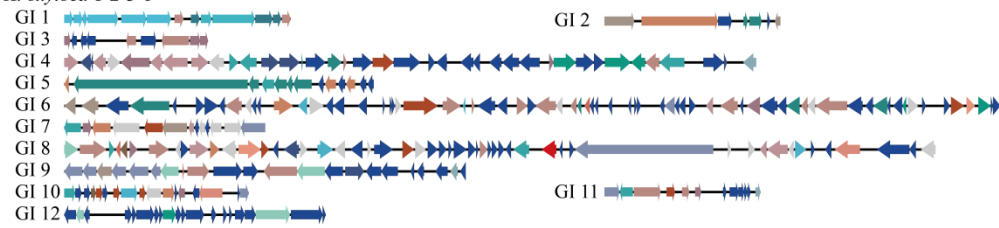

*K. oxytoca* 8-2-11

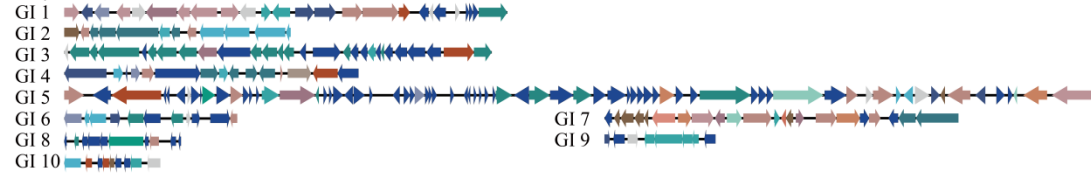

**B** *K. oxytoca* 8-3-38

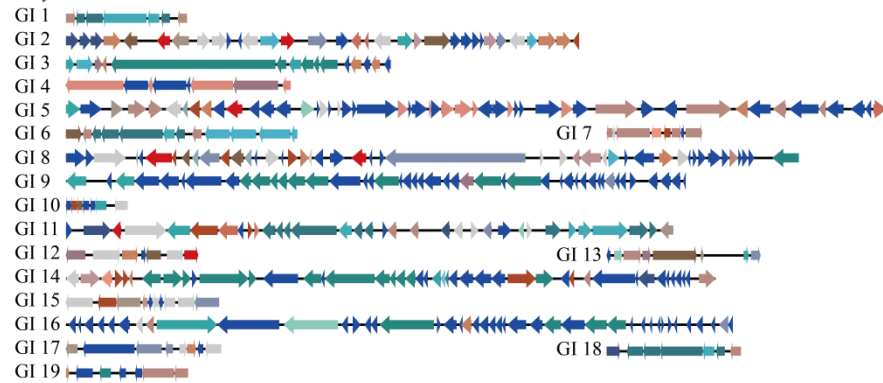

*K. oxytoca* 8-6-19

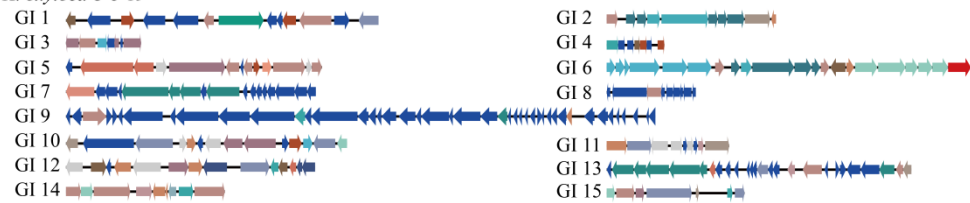

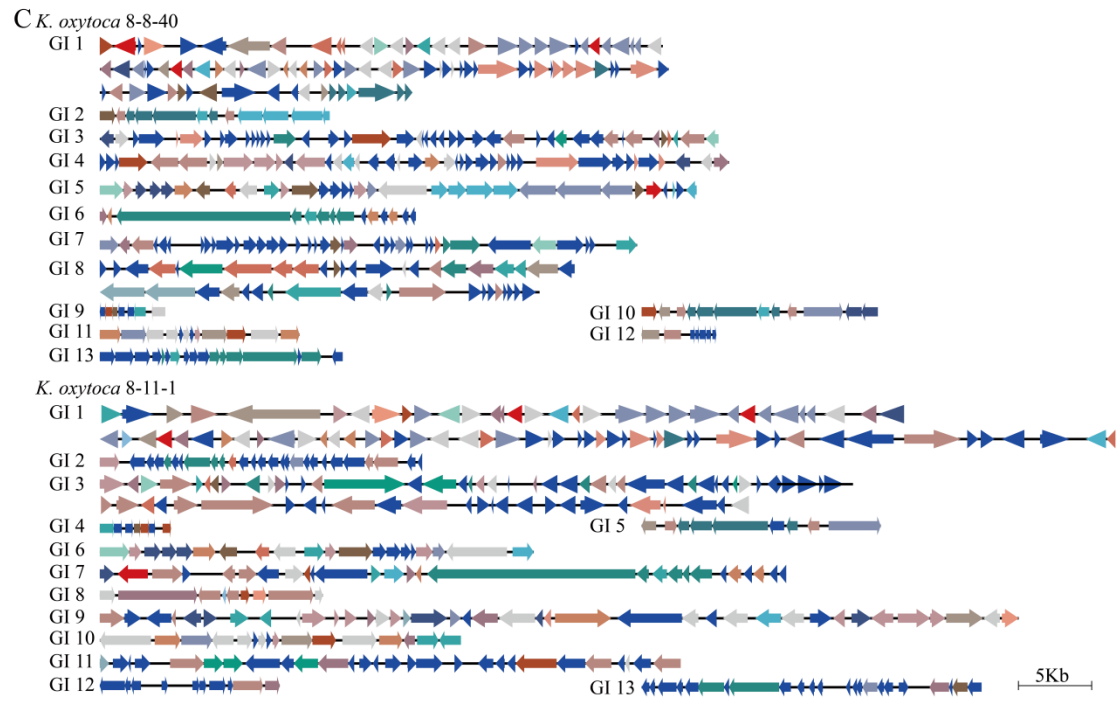

**Figure S5.** Gene organizations of the GIs identified in the *K. oxytoca* genomes (A-C). Different colors referred to COG classification to mark gene functions (Figure S5).

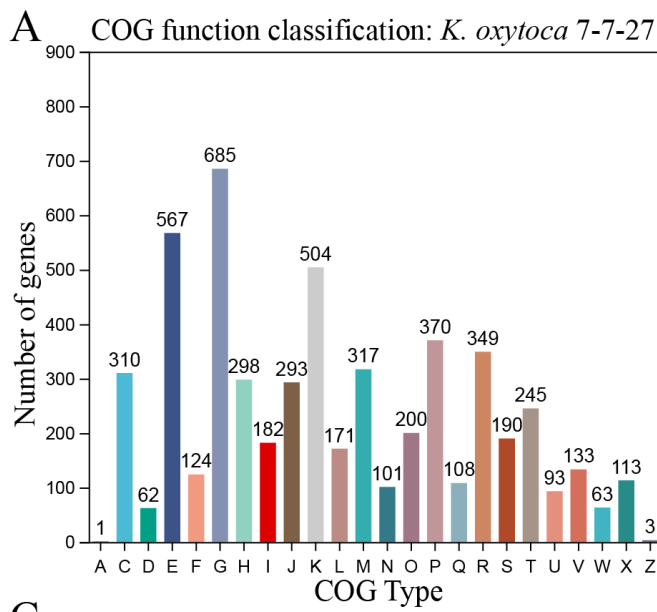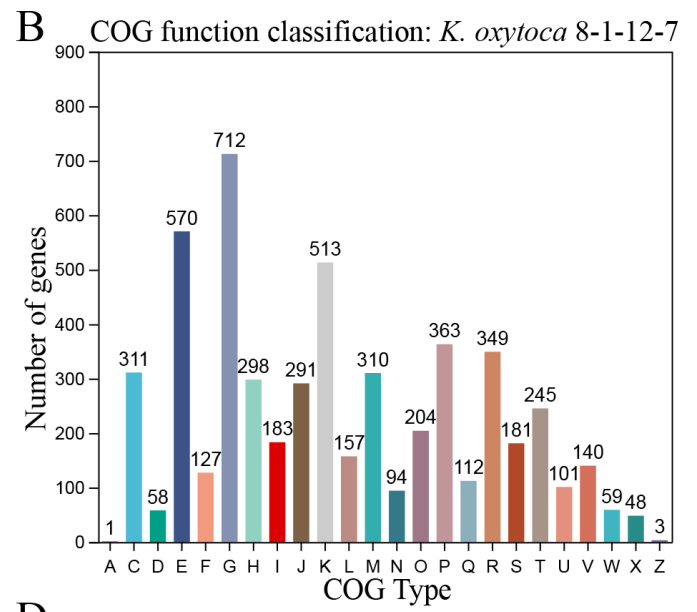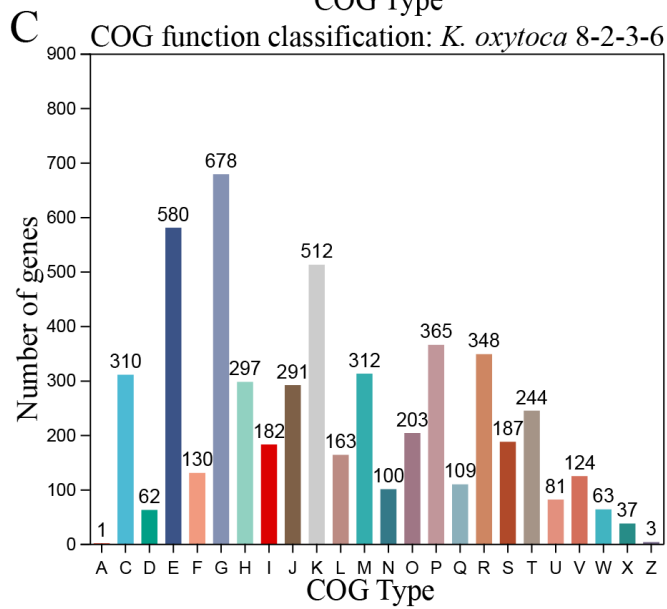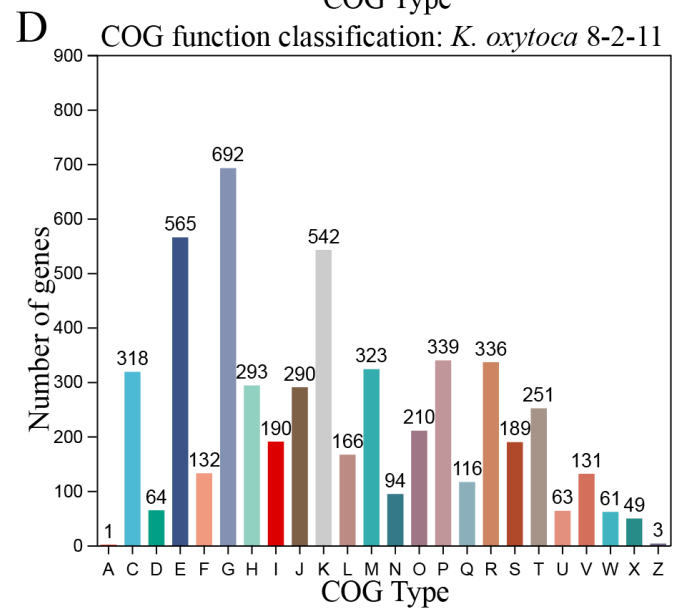

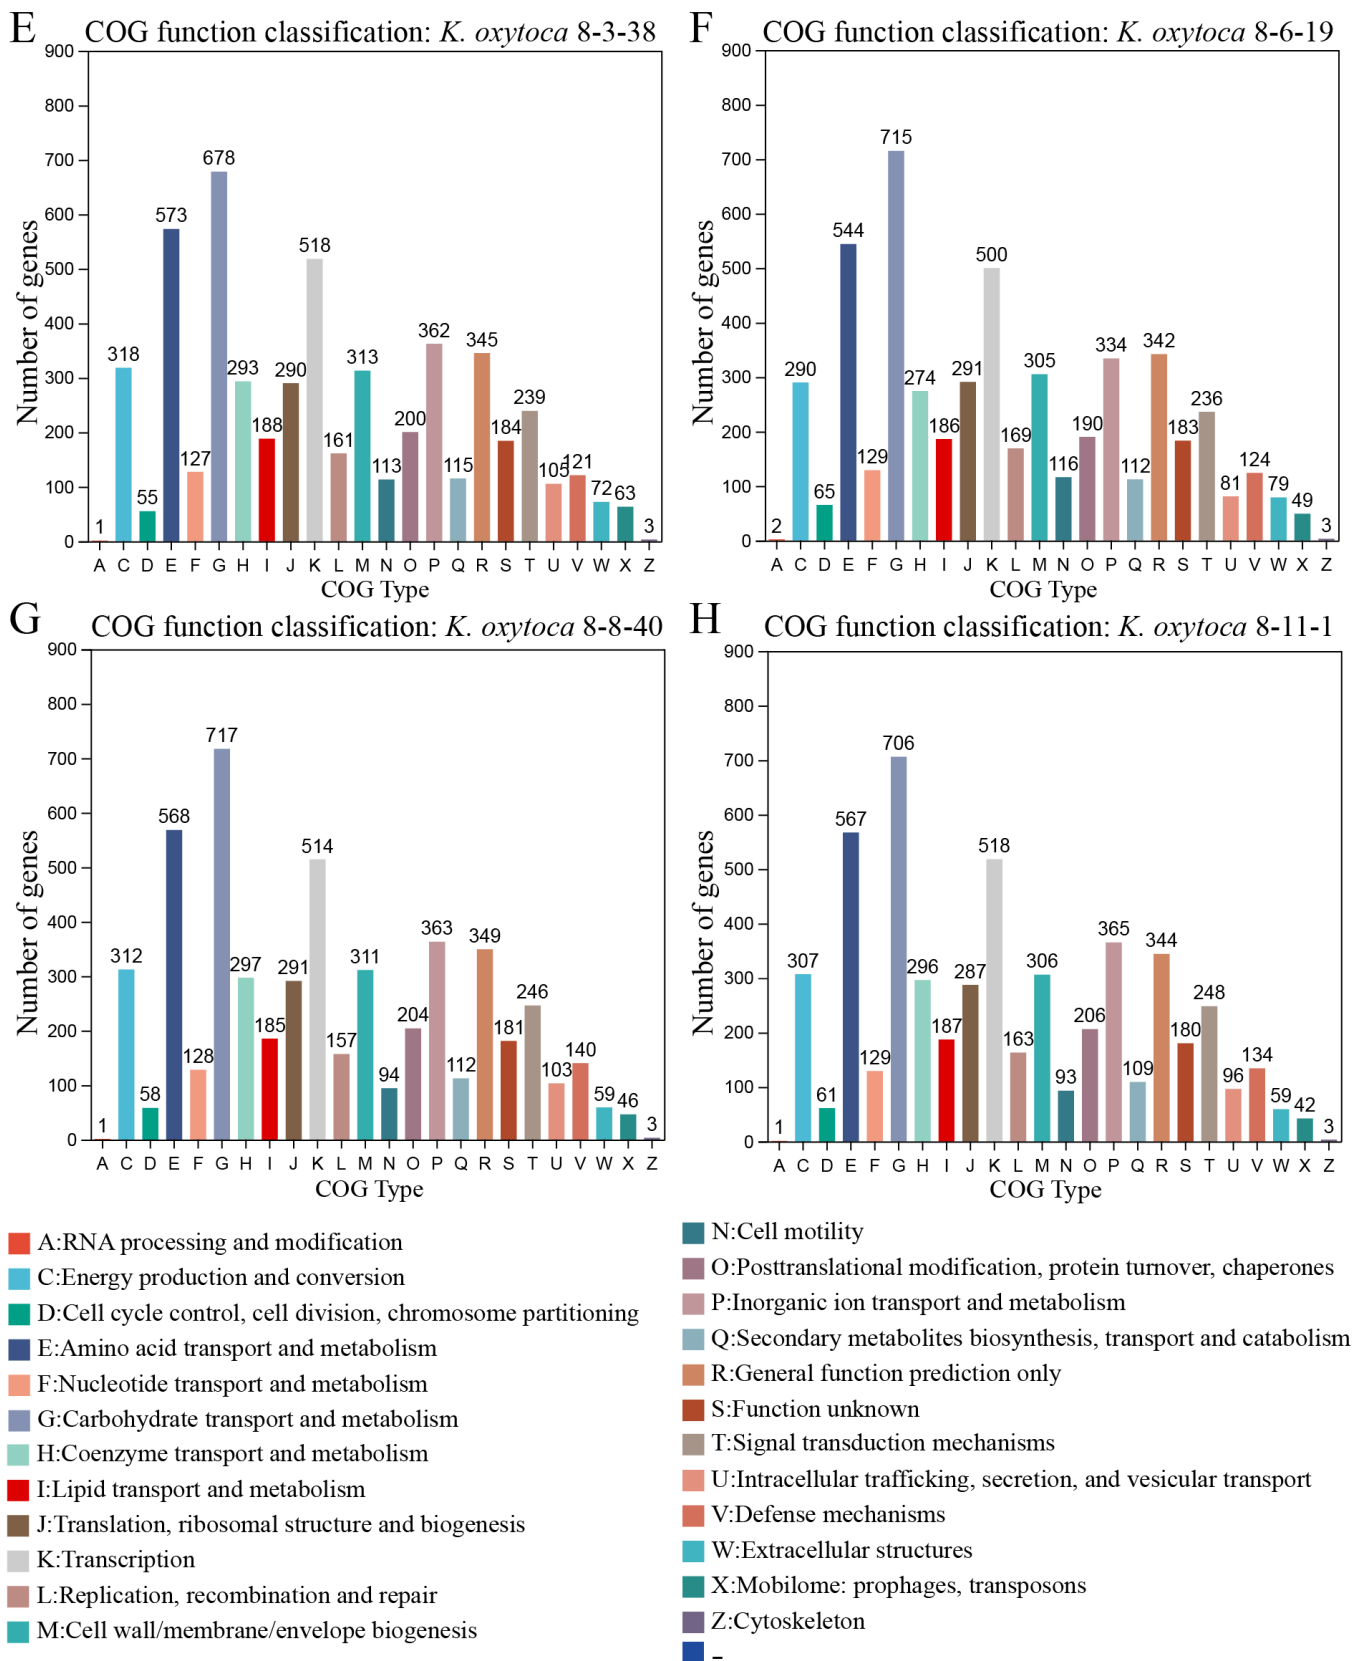

**Figure S6.** The COG function classification of the genes in the *K. oxytoca* genomes. A-H: *K. oxytoca* 7-7-27, 8-1-12-7, 8-2-3-6, 8-2-11, 8-3-38, 8-6-19, 8-8-40, and 8-11-1 genomes, respectively.



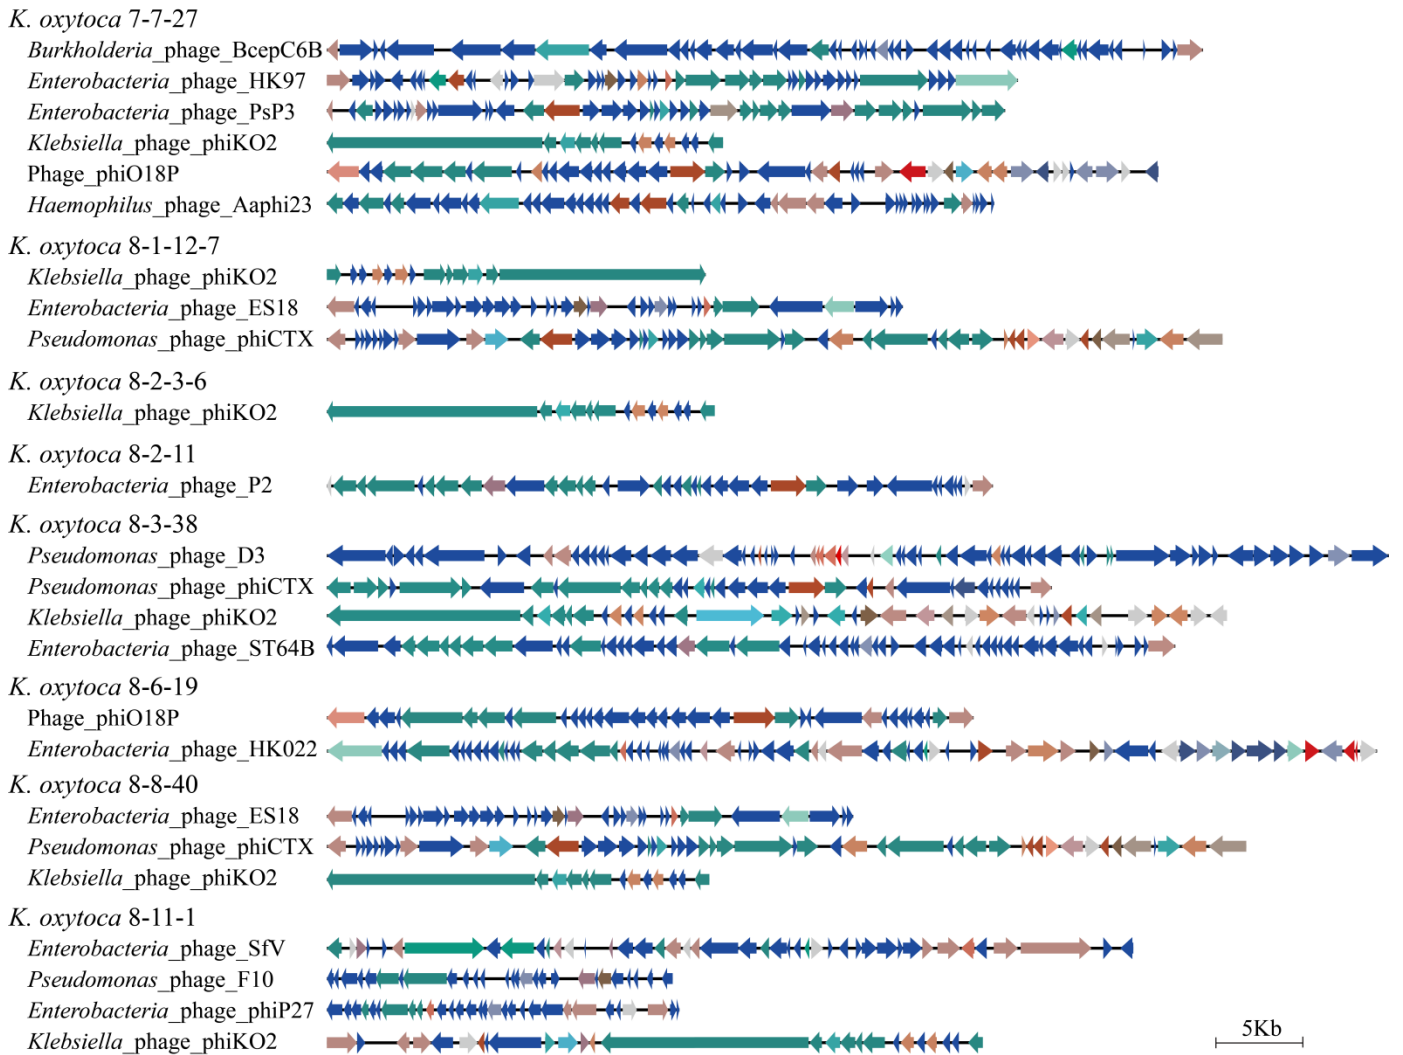

**Figure S7.** Gene organizations of the prophages identified in the *K. oxytoca* genomes. Different colors referred to COG classification to mark gene functions (Figure S5).



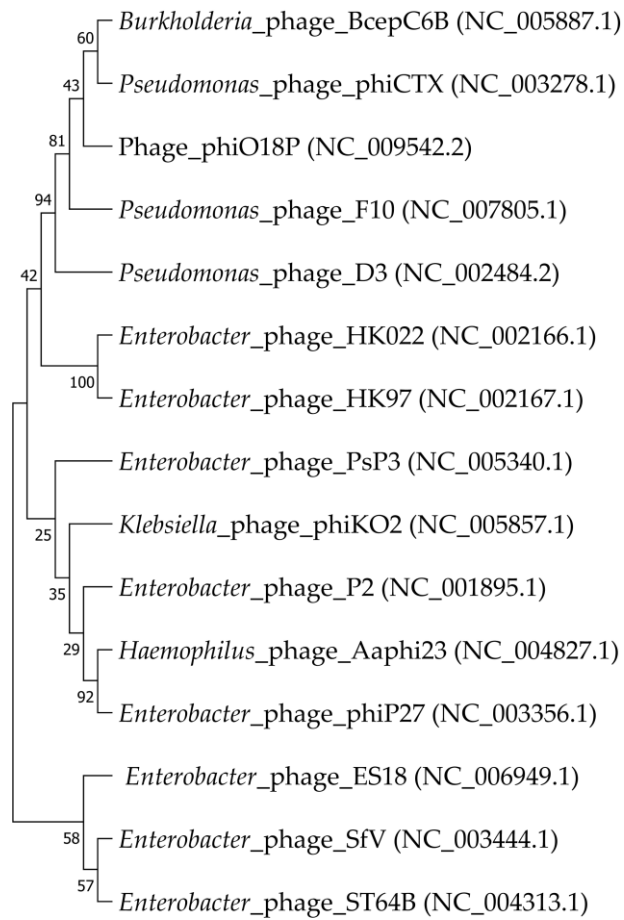

**Figure S8.** Phylogenetic relationship of the identified prophages in the *K. oxytoca* genomes.

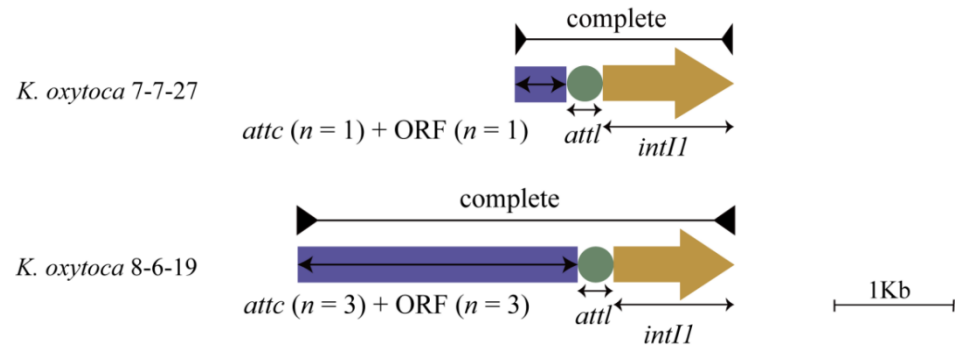

**Figure S9.** The structure diagram of the INs identified in the *K. oxytoca* genomes.

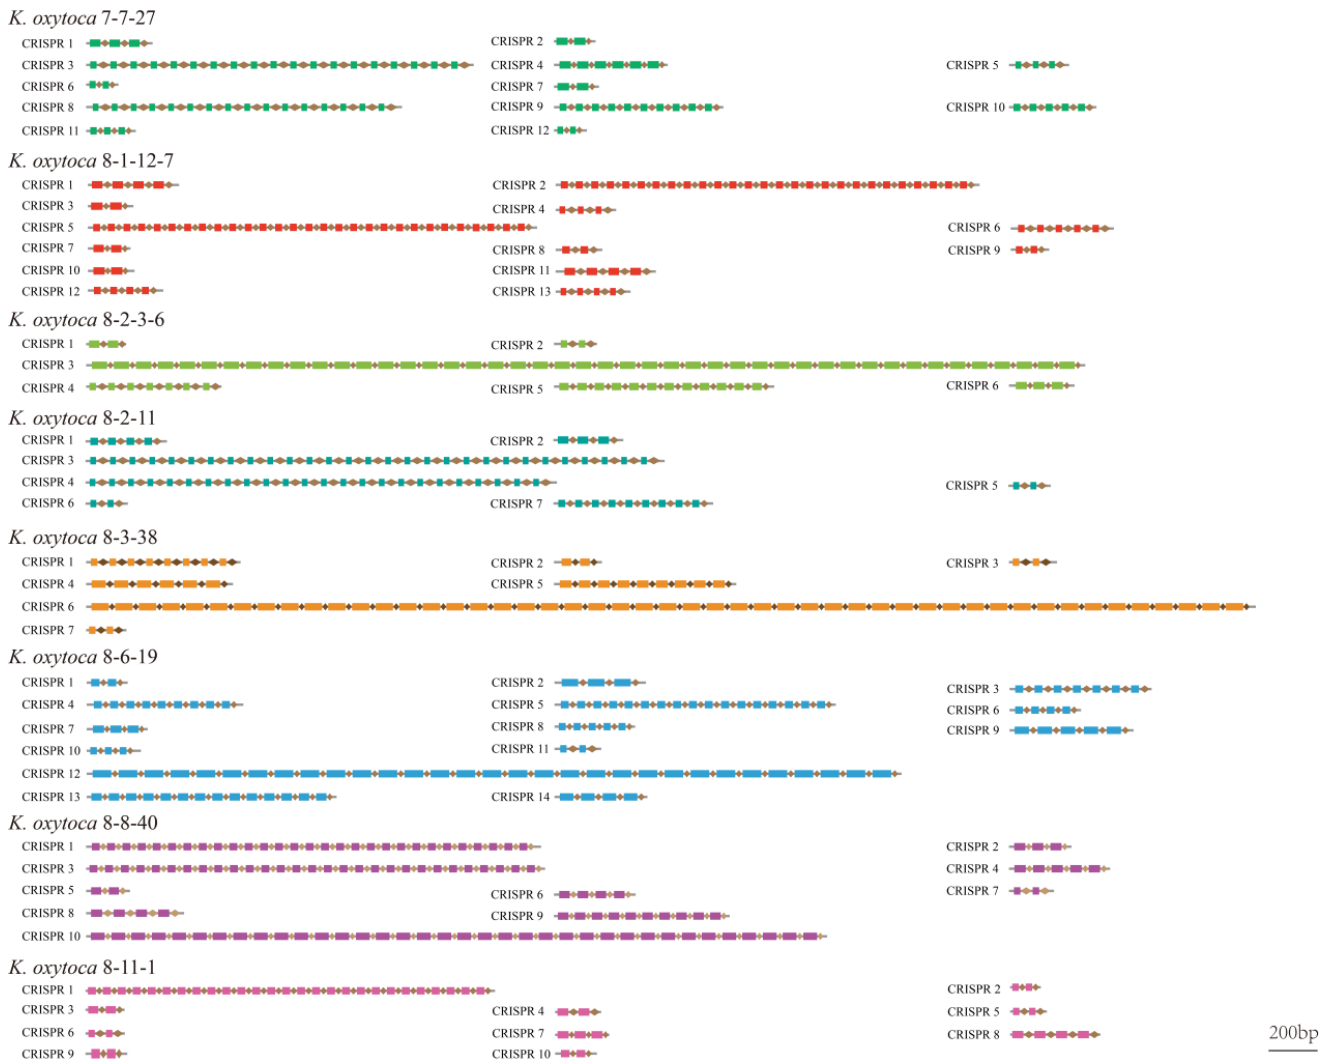

**Figure S10.** Structural features of the CRISPRs identified in the *K. oxytoca* genomes. The repeat sequences were shown by the rectangle in different colors and the spacer regions were represented by rhombuses in different colors.

## References

1. Huang, Z.; Yu, K.; Xiao, Y.; Wang, Y.; Xiao, D.; Wang, D. Comparative genomic analysis reveals potential pathogenicity and slow-growth characteristics of genus. *Microbiol. Spectr.* **2022**, *10*, e0246821. <https://doi.org/10.1128/spectrum.02468-21>.
2. Brossa, E.L. *Klebsiella pneumoniae* AcrAB efflux pump contributes to antimicrobial resistance and virulence. *Antimicrob. Agents. Chemother.* **2010**, *54*, 177–183. <https://doi.org/10.1128/aac.00715-09>.
3. E, J.E.A.A.; E, H.S.B.C.D.; F, S.H.; E, R.R.C. AdeG efflux pump as the main tigecycline resistance in *Acinetobacter baumannii*. *Gene Reports* **2020**, *20*, 100689. <https://doi.org/10.1016/j.genrep.2020.100689>.
4. Yu, C. J.; Boucher, S. N.; Hibler, Deretic. Virulence properties of *Pseudomonas aeruginosa* lacking the extreme-stress sigma factor AlgU (sigmaE). *Infect. Immune.* **1996**, *64*, 2774–2781. <https://doi.org/10.1128/iai.64.7.2774-2781.1996>.
5. Arena, F.; Henrici De Angelis, L.; Pieralli, F.; Di Pilato, V.; Giani, T.; Torricelli, F.; D'Andrea, M.M.; Rossolini, G.M. Draft genome sequence of the first hypermucoviscous *Klebsiella quasipneumoniae* subsp. *quasipneumoniae* isolate from a bloodstream infection. *Genome. Announc.* **2015**, *3*, e00952-15. <https://doi.org/10.1128/genomeA.00952-15>.
6. Ouellet, Y.H.; Ndiaye, C.T.; Gagné, S.M.; Sebilo, A.; Suits, M.D.L.; Jubinville, É.; Jia, Z.; Ivancich, A.; Couture, M. An alternative reaction for heme degradation catalyzed by the *Escherichia coli* O157:H7 ChuS protein: Release of hematinic acid, tripyrrole and Fe(III). *J. Inorg. Biochem.* **2016**, *154*, 103–113. <https://doi.org/10.1016/j.jinorgbio.2015.11.002>.
7. Kwon, H.Y.; Kim, S.W.; Choi, M.H.; Ogunniyi, A.D.; Rhee, D.K. Effect of heat shock and mutations in ClpL and ClpP on virulence gene expression in *Streptococcus pneumoniae*. *Infect. Immune.* **2003**, *71*, 3757–3765. <https://doi.org/10.1128/IAI.71.7.3757-3765.2003>.
8. Wang, G.; Peng, D.; Sun, J.; Huang, W.; Peng, H.; Long, H. Cloning and sequence analysis of a new cathepsin L-like cysteine proteinase gene from *Ditylenchus destructor*. *Chin. J. Biotechnol.* **2011**, *27*, 60–68. <https://doi.org/pubmed.ncbi.nlm.nih.gov/21553491/>.
9. Sabnis, N.A.; Yang, H.; Romeo, T. Pleiotropic Regulation of Central Carbohydrate Metabolism in *Escherichia coli* via the Gene *csrA*(\*). *J. Biol. Chem.* **1995**, *270*, 29096–29104. <https://doi.org/10.1074/jbc.270.49.29096>.
10. De Bruin, O.M.; Duplantis, B.N.; Ludu, J.S.; Hare, R.F.; Nix, E.B.; Schmerk, C.L.; Robb, C.S.; Boraston, A.B.; Hueffer, K.; Nano, F.E. The biochemical properties of the *Francisella* pathogenicity island (FPI)-encoded proteins IglA, IglB, IglC, PdpB and DotU suggest roles in type VI secretion. *Microbiology* **2011**, *157*, 3483–3491. <https://doi.org/10.1099/mic.0.052308-0>.
11. Radisic, V.; Greveskott, D.H.; Lunestad, B.T.; Øvreås, L.; Marathe, N.P. Sewage-based surveillance shows presence of *Klebsiella pneumoniae* resistant against last resort antibiotics in the population in Bergen, Norway. *Int. J. Hyg. Environ. Health.* **2023**, *248*, 114075. <https://doi.org/10.1016/j.ijheh.2022.114075>.
12. Barger, P.C.; Liles, M.R.; Newton, J.C. Type II secretion is essential for virulence of the emerging fish pathogen, hypervirulent *Aeromonas hydrophila*. *Front. Vet. Sci.* **2020**, *7*, 574113. <https://doi.org/10.3389/fvets.2020.574113>.
13. Araújo, B.F.; Ferreira, M.L.; Campos, P.A.; Royer, S.; Gonçalves, I.R.; da Fonseca Batistão, D.W.; Fernandes, M.R.; Cerdeira, L.T.; Brito, C.S.; Lincopan, N.; Gontijo-Filho, P.P.; Ribas, R.M. Hypervirulence and biofilm production in KPC-2-producing *Klebsiella pneumoniae* CG258 isolated in Brazil. *J. Med. Microbiol.* **2018**, *67*, 523–528. <https://doi.org/10.1099/jmm.0.000711>.
14. De, L.V.; Wee, S.; Herrero, M.; Neilands, J.B. Operator sequences of the aerobactin operon of plasmid ColV-K30 binding the ferric uptake regulation (fur) repressor. *J. Bacteriol.* **1987**, *169*, 2624–2630. <https://doi.org/10.1128/jb.169.6.2624-2630.1987>.
15. Fatima, S.; Akbar, A.; Irfan, M.; Shafee, M.; Ali, A.; Ishaq, Z.; Raza, S.K.; Samad, A.; Alshahrani, M.Y.; Hassan, S.S. Virulence factors and antimicrobial resistance of uropathogenic *Escherichia coli* EQ101 UPEC isolated from UTI patient in Quetta, Balochistan, Pakistan. *Biomed. Res. Int.* **2023**, *2023*, 7278070. <https://doi.org/10.1155/2023/7278070>.
16. Bager, R.J.; Nesta, B.; Pors, S.E.; Soriani, M.; Serino, L.; Boyce, J.D.; Adler, B.; Bojesen, A.M. The fimbrial protein GalF-A from *Gallibacterium anatis* is a virulence factor and vaccine candidate. *Infect. Immun.* **2013**, *81*, 1964–1973. <https://doi.org/10.1128/iai.00059-13>.
17. Chang, H.Y.; Lee, J.H.; Deng, W.L.; Fu, T.F.; Peng, H.L. Virulence and outer membrane properties of a galU mutant of *Klebsiella pneumoniae* CG43. *Microb. Pathog.* **1996**, *20*, 255–261. <https://doi.org/10.1006/mpat.1996.0024>.
18. Brooke, J.S.; Valvano, M.A. Molecular cloning of the *Haemophilus influenzae* gmhA (lpcA) gene encoding a phosphoheptose isomerase required for lipooligosaccharide biosynthesis. *J. Bacteriol.* **1996**, *178*, 3339–3341. <https://doi.org/10.1111/j.1365-2672.1996.tb03274.x>.
19. Sui, Y.F.; Schütze, T.; Ouyang, L.M.; Lu, H.; Liu, P.; Xiao, X.; Qi, J.; Zhuang, Y.P.; Meyer, V. Engineering cofactor metabolism for improved protein and glucoamylase production in *Aspergillus niger*. *Microb. Cell. Fact.* **2020**, *19*, 198. <https://doi.org/10.1186/s12934-020-01450-w>.
20. Zhang, A.; Han, Y.; Huang, Y.; Hu, X.; Liu, P.; Liu, X.; Kan, B.; Liang, W. vgrG is separately transcribed from hcp in T6SS orphan clusters and is under the regulation of IHF and HapR. *Biochem. Biophys. Res. Commun.* **2021**, *559*, 15–20. <https://doi.org/10.1016/j.bbrc.2021.04.092>.
21. Valciņa, O.; Pūle, D.; Ķibilds, J.; Labecka, L.; Terentjeva, M.; Krūmiņa, A.; Bērziņš, A. Evaluation of genetic diversity and virulence potential of *Legionella pneumophila* isolated from water supply systems of residential buildings in Latvia. *Pathogens* **2023**, *12*, 884. <https://doi.org/10.3390/pathogens12070884>.
22. Pira, H.; Risdian, C.; Müsken, M.; Schupp, P.J.; Wink, J. *Photobacterium arenosum* WH24, isolated from the gill of Pacific oyster *Crassostrea gigas* from the North Sea of Germany: co-cultivation and prediction of virulence. *Curr. Microbiol.* **2022**, *79*, 219. <https://doi.org/10.1007/s00284-022-02909-2>.
23. Zheng, H.Y.; Yan, L.; Yang, C.; Wu, Y.R.; Qin, J.L.; Hao, T.Y.; Yang, D.J.; Guo, Y.C.; Pei, X.Y.; Zhao, T.Y.; Cui, Y.J. Population genomics study of *Vibrio alginolyticus*. *Hereditas* **2021**, *43*, 350–361. <https://doi.org/10.16288/j.ycz.21-061>.

24. Li, J.; Tang, M.; Xia, F.; Min, C.; Hu, Y.; Wang, H.; Zou, M. Emergence of polymyxin B-heteroresistant hypervirulent *Klebsiella pneumoniae* from an individual in the community with asymptomatic bacteriuria. *BMC. microbial.* **2022**, *22*, 47. <https://doi.org/10.1186/s12866-022-02462-9>.
25. Zhang, Y.; Tian, X.; Fan, F.; Wang, X.; Dong, S. The dynamic evolution and IS26-mediated interspecies transfer of a bla(NDM-1)-bearing fusion plasmid leading to a hypervirulent carbapenem-resistant *Klebsiella pneumoniae* strain harboring bla(KPC-2) in a single patient. *J. Glob. Antimicrob. Resist.* **2023**, *35*, 181–189. <https://doi.org/10.1016/j.jgar.2023.08.021>.
26. Lee, Y.; Roh, H.; Kim, A.; Park, J.; Lee, J.Y.; Kim, Y.J.; Kang, Y.R.; Kang, H.; Kim, S.; Kim, H.S.; Cha, H.J.; Choi, Y.H.; Nam, B.H.; Park, C.I.; Kim, D.H. Molecular mechanisms underlying the vulnerability of Pacific abalone (*Haliotis discus hannai*) to *Vibrio harveyi* infection at higher water temperature. *Fish. Shellfish. Immunol.* **2023**, *138*, 108844. <https://doi.org/10.1016/j.fsi.2023.108844>.
27. Huang, Z.; Yu, K.; Xiao, Y.; Wang, Y.; Xiao, D.; Wang, D. Comparative genomic analysis reveals potential pathogenicity and slow-growth characteristics of genus *Brevundimonas* and description of *Brevundimonas pishanensis* sp. nov. *Microbiol. Spectr.* **2022**, *10*, e0246821. <https://doi.org/10.1128/spectrum.02468-21>.
28. Ahsan, U.; Mushtaq, F.; Saleem, S.; Malik, A.; Sarfaraz, H.; Shahzad, M.; Uhlin, B.E.; Ahmad, I. Emergence of high colistin resistance in carbapenem resistant *Acinetobacter baumannii* in Pakistan and its potential management through immunomodulatory effect of an extract from *Saussurea lappa*. *Front. Pharmacol.* **2022**, *13*, 986802. <https://doi.org/10.3389/fphar.2022.986802>.
29. Xie, L.Y.; Xu, Y.B.; Ding, X.Q.; Liang, S.; Li, D.L.; Fu, A.K.; Zhan, X.A. Itaconic acid and dimethyl itaconate exert antibacterial activity in carbon-enriched environments through the TCA cycle. *Biomed. Pharmacother.* **2023**, *167*, 115487. <https://doi.org/10.1016/j.biopha.2023.115487>.
30. Lee, E.J.; Groisman, E.A. Tandem attenuators control expression of the *Salmonella* mgtCBR virulence operon. *Mol. Microbiol.* **2012**, *86*, 212–224. <https://doi.org/10.1111/j.1365-2958.2012.08188.x>.
31. Araújo, B.F.; Ferreira, M.L.; Campos, P.A.; Royer, S.; Gonçalves, I.R.; da Fonseca Batistão, D.W.; Fernandes, M.R.; Cerdeira, L.T.; Brito, C.S.; Lincopan, N.; Gontijo-Filho, P.P.; Ribas, R.M. Hypervirulence and biofilm production in KPC-2-producing *Klebsiella pneumoniae* CG258 isolated in Brazil. *J. Med. Microbiol.* **2018**, *67*, 523–528. <https://doi.org/10.1099/jmm.0.000711>.
32. Wu, Y.; Gong, Z.; Wang, S.; Song, L. Occurrence and prevalence of antibiotic resistance genes and pathogens in an industrial park wastewater treatment plant. *Sci. Total. Environ.* **2023**, *880*, 163278. <https://doi.org/10.1016/j.scitotenv.2023.163278>.
33. Bratu, S.; D.; Landman, D.; A.; Martin, C.; Georgescu, J. Correlation of antimicrobial resistance with beta-Lactamases, the OmpA-like Porin, and efflux pumps in clinical isolates of *Acinetobacter baumannii* endemic to New York City. *Antimicrob. Agents. Ch.* **2008**, *52*, 2999–3005. <https://doi.org/10.1128/AAC.01684-07>.
34. Hsin-Yao; Cheng; Yi-Fong; ChenHwei-Ling; Peng, Molecular characterization of the PhoPQ-PmrD-PmrAB mediated pathway regulating polymyxin B resistance in *Klebsiella pneumoniae* CG43. *J. Biomed. Sci.* **2010**, *7*, 60. <https://doi.org/10.1186/1423-0127-17-60>.
35. Fang, N.; Yang, H.; Fang, H.; Liu, L.; Zhang, Y.; Wang, L.; Han, Y.; Zhou, D.; Yang, R. RcsAB is a major repressor of *Yersinia* biofilm development through directly acting on hmsCDE, hmsT, and hmsHFRS. *Sci. Rep.* **2015**, *5*, 9566. <https://doi.org/10.1038/srep09566>.
36. Linkevicius, M.; Sandegren, L.; Andersson, D.I. Mechanisms and fitness costs of tigecycline resistance in *Escherichia coli*. *J. Antimicrob. Chemother.* **2013**, *68*, 2809–2819. <https://doi.org/10.1093/jac/dkt263>.
37. Fan, Z.; Fu, T.; Li, Z.; Du, B.; Cui, X.; Zhang, R.; Feng, Y.; Zhao, H.; Xue, G.; Cui, J.; Yan, C.; Gan, L.; Feng, J.; Xu, Z.; Yu, Z.; Tian, Z.; Ding, Z.; Chen, J.; Chen, Y.; Yuan, J. The role of integration host factor in biofilm and virulence of high-alcohol-producing *Klebsiella pneumoniae*. *Microbiol. Spectr.* **2023**, e0117023. <https://doi.org/10.1128/spectrum.01170-23>.
38. Huang, Y.; Leming, C.L.; Suyemoto, M.; Altier, C. Genome-wide screen of *Salmonella* genes expressed during infection in pigs, using in vivo expression technology. *Appl. Environ. Microbiol.* **2007**, *73*, 7522–7530. <https://doi.org/10.1128/aem.01481-07>.
39. Iriarte, M.; Stainier, I.; Cornelis, G.R. The rpoS gene from *Yersinia enterocolitica* and its influence on expression of virulence factors. *Infect. Immun.* **1995**, *63*, 1840–1847. <https://doi.org/10.1128/iai.63.5.1840-1847.1995>.
40. Le, T.B.; Truong, M.N.; Nguyen, B.T.; Vo, D.Q.; Phan, T.T.P. Draft genome sequencing data of the bacterial wilt, *Ralstonia pseudosolanacearum* T2C-Rasto, from *Cucumis sativus*, in An Giang province, Mekong Delta - Southwest Vietnam. *Data in brief* **2023**, *48*, 109252. <https://doi.org/10.1016/j.dib.2023.109252>.
41. Dubey, V.; Gupta, R.; Pathania, R. Targeting superoxide dismutase confers enhanced reactive oxygen species mediated eradication of Polymyxin B induced *Acinetobacter baumannii* persisters. *Antimicrob. Agents. Chemother.* **2023**, *95*, e02180-20. <https://doi.org/10.1128/aac.02180-20>.
42. English, G.; Byron, O.; Cianfanelli, F.R.; Prescott, A.R.; Coulthurst, S.J. Biochemical analysis of TssK, a core component of the bacterial Type VI secretion system, reveals distinct oligomeric states of TssK and identifies a TssK-TssFG subcomplex. *Biochem. J.* **2014**, *461*, 291–304. <https://doi.org/10.1042/bj20131426>.
43. Safi, A.U.R.; Mansour Salih, M.; Rahman, H.; Khattak, B.; El Askary, A.; Hussain Khalifa, E.; Qasim, M. Immunoaffinity-based mass spectrometric characterization of immunoreactive proteins of *Salmonella Typhi*. *Saudi. J. Biol. Sci.* **2023**, *30*, 103502. <https://doi.org/10.1016/j.sjbs.2022.103502>.
44. Voland, P.; Weeks, D.L.; Marcus, E.A.; Prinz, C.; Sachs, G.; Scott, D. Interactions among the seven *Helicobacter pylori* proteins encoded by the urease gene cluster. *Am. J. Physiol. Gastrointest. Liver. Physiol.* **2003**, *284*, G96–G106. <https://doi.org/10.1152/ajpgi.00160.2002>.

45. Bajire, S.K.; Ghate, S.D.; Shetty, S.; Banerjee, S.; Rao, R.S.P.; Shetty, V.; Shastri, R.P. Unveiling the role of hub proteins in controlling quorum sensing regulated virulence through analogues in *Pseudomonas aeruginosa* PAO1: a functional protein-protein network biology approach. *Biochem. Bioph. Res. Co.* **2023**, *660*, 13–20. <https://doi.org/10.1016/j.bbrc.2023.03.079>.
46. Saak, C.C.; Zepeda-Rivera, M.A.; Gibbs, K.A. A single point mutation in a TssB/VipA homolog disrupts sheath formation in the type VI secretion system of *Proteus mirabilis*. *PLoS one* **2017**, *12*, e0184797. <https://doi.org/10.1371/journal.pone.0184797>.
47. Peng, N.; Xu, W.; Luo, H.M.; Ouyang, P.W.; Jiang, B.; Zhang, Z.H.; Cao, Y.D.; Tan, L.M.; Qu, P.H.; Xie, L.Y. *Pigmentibacter ruber* gen. nov., sp. nov., a novel bacterium of the family *Silvanigrellaceae* isolated from human blood. *Antonie van Leeuwenhoek* **2021**, *114*, 731–739. <https://doi.org/10.1007/s10482-021-01553-3>.
48. Huang, Y.T.; Cheng, J.F.; Liu, Y.T.; Mao, Y.C.; Wu, M.S.; Liu, P.Y. Genome-based analysis of virulence determinants of a *Serratia marcescens* strain from soft tissues following a snake bite. *Future. Microbiol.* **2018**, *13*, 331–343. <https://doi.org/10.2217/fmb-2017-0202>.
49. Saha, O.; Rakhi, N.N.; Hoque, M.N.; Sultana, M.; Hossain, M.A. Genome-wide genetic marker analysis and genotyping of *Escherichia fergusonii* strain OTSVEF-60. *Braz. J. Microbiol.* **2021**, *52*, 989–1004. <https://doi.org/10.1007/s42770-021-00441-2>.
50. Yi, X.; Yamazaki, A.; Biddle, E.; Zeng, Q.; Yang, C.H. Genetic analysis of two phosphodiesterases reveals cyclic diguanylate regulation of virulence factors in *Dickeya dadantii*. *Mol. Microbiol.* **2010**, *77*, 787–800. <https://doi.org/10.1111/j.1365-2958.2010.07246.x>.
51. Sheng, J.; Cave, R.; Ter-Stepanyan, M.M.; Kotsinyan, N.; Chen, J.; Zhang, L.; Jiang, T.; Mkrtchyan, H.V. Whole-genome sequencing and comparative genomics analysis of a newly emerged multidrug-resistant *Klebsiella pneumoniae* isolate of ST967. *Microbiol. Spectr.* **2023**, *11*, e0401122. <https://doi.org/10.1128/spectrum.04011-22>.
52. Lu, Y.; Feng, Y.; McNally, A.; Zong, Z. Occurrence of colistin-resistant hypervirulent *Klebsiella variicola*. *J. Antimicrob. Chemother.* **2018**, *73*, 3001–3004. <https://doi.org/10.1093/jac/dky301>.
53. Shen, L.; Zhang, J.; Xue, J.; Du, L.; Yuan, L.; Nie, H.; Dai, S.; Yu, Q.; Li, Y. Regulation of ECP fimbriae-related genes by the transcriptional regulator RcsAB in *Klebsiella pneumoniae* NTUH-K2044. *J. Basic. Microb.* **2022**, *62*, 593–603. <https://doi.org/10.1002/jobm.202100595>.
54. Frank, K.L.; Bundle, S.F.; Kresge, M.E.; Eggers, C.H.; Samuels, D.S. aadA confers streptomycin resistance in *Borrelia burgdorferi*. *J. Bacteriol.* **2003**, *185*, 6723–6727. <https://doi.org/10.1128/JB.185.22.6723-6727.2003>.
55. Vaziri, F.; Peerayeh, S.N.; Nejad, Q.B.; Farhadian, A. The prevalence of aminoglycoside-modifying enzyme genes (aac (6')-I, aac (6')-II, ant (2'')-I, aph (3')-VI) in *Pseudomonas aeruginosa*. *Clinics* **2011**, *66*, 1519–1522. <https://doi.org/10.1590/s1807-59322011000900002>.
56. Mi, Y.; Zheng, P.Y.; Zhang, B.Y.; Liu, Z.Q.; Yang, P.C. Role of ABC transporter genes msbA and spab in multidrug resistance of *Helicobacter pylori*. *World Chinese Journal of Digestology* **2011**, *19*, 1500–1505. <https://doi.org/10.11569/wcjd.v19.i14.1500>.
57. Soares, G.G.; Campanini, E.B.; Ferreira, R.L.; Damas, M.S.F.; Rodrigues, S.H.; Campos, L.C.; Galvão, J.D.; Fuentes, A.; Freire, C.C.M.; Malavazi, I.; Pitondo-Silva, A.; Cunha, A.F.D.; Pranchevicius, M.D.S. *Brevundimonas brasiliensis* sp. nov.: a new multidrug-resistant species isolated from a patient in Brazil. *Microbiol. Spectr.* **2023**, *11*, e0441522. <https://doi.org/10.1128/spectrum.04415-22>.
58. Batista, M.P.B.; Cavalcante, F.S.; Alves Cassini, S.T.; Pinto Schuenck, R. Diversity of bacteria carrying antibiotic resistance genes in hospital raw sewage in Southeastern Brazil. *Water. Sci. Technol.* **2023**, *87*, 239–250. <https://doi.org/10.2166/wst.2022.427>.
59. Yu, M.; Zhao, Y. Spectinomycin resistance in *Lysobacter enzymogenes* is due to its rRNA target but also relies on cell-wall recycling and purine biosynthesis. *Front. Microbiol.* **2022**, *13*, 988110. <https://doi.org/10.3389/fmicb.2022.988110>.
60. Cheng, C.; Yan, X.; Liu, B.; Jiang, T.; Zhou, Z.; Guo, F.; Zhang, Q.; Li, C.; Fang, T. SdiA enhanced the drug resistance of *Cronobacter sakazakii* and suppressed its motility, adhesion and biofilm formation. *Front. Microbiol.* **2022**, *13*, 901912. <https://doi.org/10.3389/fmicb.2022.901912>.
61. García-Sureda, L.; Juan, C.; Doménech-Sánchez, A.; Albertí, S. Role of *Klebsiella pneumoniae* LamB Porin in antimicrobial resistance. *Antimicrob. Agents. Chemother.* **2011**, *55*, 1803–1805. <https://doi.org/10.1128/aac.01441-10>.
62. Ferreira, C.; Luzietti, L.; Ribeirinho-Soares, S.; Nunes, O.C.; Vaz-Moreira, I.; Manaia, C.M. Survival of clinical and environmental carbapenem-resistant *Klebsiella pneumoniae* ST147 in surface water. *Environ. Res.* **2023**, *237*, 116928. <https://doi.org/10.1016/j.envres.2023.116928>.
63. Liu, P.; Chen, S.; Wu, Z.Y.; Qi, M.; Li, X.Y.; Liu, C.X. Mechanisms of fosfomycin resistance in clinical isolates of carbapenem-resistant *Klebsiella pneumoniae*. *J. Glob. Antimicrob. Resist.* **2020**, *22*, 238–243. <https://doi.org/10.1016/j.jgar.2019.12.019>.
64. Li, P.; Lei, T.; Zhou, Y.; Dai, Y.; Yang, Z.; Luo, H. EBR-5, a novel variant of metallo- $\beta$ -lactamase EBR from multidrug-resistant *Empedobacter stercoris*. *Microbiol. Spectr.* **2023**, e0003923. <https://doi.org/10.1128/spectrum.00039-23>.
65. Cheng, W.H.; Shao, W.Y.; Wen, M.Y.; Su, P.Y.; Ho, C.H. Molecular characterization of cefepime and aztreonam nonsusceptibility in *Haemophilus influenzae*. *J. Antimicrob. Chemother.* **2023**, *78*, 1622–1631. <https://doi.org/10.1093/jac/dkad137>.
66. Alzayn, M.; Dulyayangkul, P.; Satapoomin, N.; Heesom, K.J.; Avison, M.B. OmpF downregulation mediated by Sigma E or OmpR activation confers cefalexin resistance in *Escherichia coli* in the absence of acquired  $\beta$ -lactamases. *Antimicrob. Agents. Chemother.* **2021**, *65*, e0100421. <https://doi.org/10.1128/aac.01004-21>.
67. Chen, Q.; Quan, H.; Yu, Y.; Liu, D.; Li, C.; Chu, Y.; Gong, X. EptA of *Riemerella anatipestifer* mediates phenotypes involved in colistin resistance and virulence. *FASEB. J.* **2023**, *37*, e22928. <https://doi.org/10.1096/fj.202300215R>.

68. Chamoun, S.; Welander, J.; Martis-Thiele, M.M.; Ntzouni, M.; Claesson, C.; Vikström, E.; Turkina, M.V. Colistin dependence in extensively drug-resistant *Acinetobacter baumannii* strain is associated with ISA<sub>Jo2</sub> and ISA<sub>Ab13</sub> insertions and multiple cellular responses. *Int. J. Mol. Sci.* **2021**, *22*, 576. <https://doi.org/10.3390/ijms22020576>.
69. Huang, J.; Li, C.; Song, J.; Velkov, T.; Wang, L.; Zhu, Y.; Li, J. Regulating polymyxin resistance in Gram-negative bacteria: roles of two-component systems PhoPQ and PmrAB. *Future. Microbiol.* **2020**, *15*, 445–459. <https://doi.org/10.2217/fmb-2019-0322>.
70. Machimbirike, V.I.; Vasquez, I.; Cao, T.; Chukwu-Osazuwa, J.; Onireti, O.; Segovia, C.; Khunrae, P.; Rattanaojpong, T.; Booman, M.; Jones, S.; Soto-Davila, M.; Dixon, B.; Santander, J. Comparative genomic analysis of virulent *Vibrio (Listonella) anguillarum* serotypes revealed genetic diversity and genomic signatures in the O-antigen biosynthesis gene cluster. *Microorganisms* **2023**, *11*, 792. <https://doi.org/10.3390/microorganisms11030792>.
71. Sorlozano-Puerto, A.; Lopez-Machado, I.; Albertuz-Crespo, M.; Martinez-Gonzalez, L.J.; Gutierrez-Fernandez, J. Characterization of fosfomycin and nitrofurantoin resistance mechanisms in *Escherichia coli* isolated in clinical urine samples. *Antibiotics* **2020**, *9*, 534. <https://doi.org/10.3390/antibiotics9090534>.
72. Hirakawa, H.; Takita, A.; Sato, Y.; Hiramoto, S.; Hashimoto, Y.; Ohshima, N.; Minamishima, Y.A.; Murakami, M.; Tomita, H. Inactivation of ackA and pta genes reduces GlpT expression and susceptibility to fosfomycin in *Escherichia coli*. *Microbiol. Spectr.* **2023**, *11*, E0506922. <https://doi.org/10.1128/spectrum.05069-22>.
73. Wang, J.; Xu, X.; Zhao, X.; Xu, S.; Wang, M. hptA mutation may mediate fosfomycin resistance in methicillin-resistant *Staphylococcus aureus* clinical isolates. *Microb. Drug. Resist.* **2023**. Online ahead of print. <https://doi.org/10.1089/mdr.2022.0173>.
74. Montemari, A.L.; Marzano, V.; Essa, N.; Levi Mortera, S.; Rossitto, M.; Gardini, S.; Selan, L.; Vrenna, G.; Onetti Muda, A.; Putignani, L.; Fiscarelli, E.V. A shaving proteomic approach to unveil surface proteins modulation of multi-drug resistant *Pseudomonas aeruginosa* strains isolated from cystic fibrosis patients. *Front. Med.* **2022**, *9*, 818669. <https://doi.org/10.3389/fmed.2022.818669>.
75. Chukwu, K.B.; Abafe, O.A.; Amoako, D.G.; Essack, S.Y.; Abia, A.L.K. Environmental concentrations of antibiotics, biocides, and heavy metals fail to induce phenotypic antimicrobial resistance in *Escherichia coli*. *Sci. Total. Environ.* **2023**, *899*, 165721. <https://doi.org/10.1016/j.scitotenv.2023.165721>.
76. Yang, X.; Qian, M.; Wang, Y.; Qin, Z.; Luo, M.; Chen, G.; Yi, C.; Ma, Y.; Liu, X.; Liu, Z. Thiol-based modification of MarR protein VnrR regulates resistance towards nitrofurantoin in *Vibrio cholerae* by promoting the expression of a novel nitroreductase VnrA and of NO-detoxifying enzyme HmpA. *Antioxid. Redox. Signal.* **2023**. Online ahead of print. <https://doi.org/10.1089/ars.2022.0205>.
77. Day, M.A.; Jarrom, D.; Christofferson, A.J.; Graziano, A.E.; Anderson, J.L.R.; Searle, P.F.; Hyde, E.I.; White, S.A. The structures of *E. coli* NfsA bound to the antibiotic nitrofurantoin; to 1,4-benzoquinone and to FMN. *Biochem. J.* **2021**, *478*, 2601–2617. <https://doi.org/10.1042/bcj20210160>.
78. Wang, W.; Li, S.; Ge, Q.; Guo, H.; Shang, Y.; Ren, W.; Wang, Y.; Xue, Z.; Lu, J.; Pang, Y. Determination of critical concentration for drug susceptibility testing of *Mycobacterium tuberculosis* against para-aminosalicylic acid with clinical isolates with thyA, folC and dfrA mutations. *Ann Clin Microbiol Antimicrob.* **2022**, *21*, 48. <https://doi.org/10.1186/s12941-022-00537-z>.
79. Zhang, W.; Li, S.; Deng, B.; Wu, P.; Shui, Y.; Zhang, J.; Li, Z. Transcriptome analysis of sRNA responses to four different antibiotics in *Pseudomonas aeruginosa* PAO1. *Microb. Pathog.* **2022**, *173*, 105865. <https://doi.org/10.1016/j.micpath.2022.105865>.
80. Liu, C.; Wang, L.; Wang, P.; Xiao, D.; Zou, Q. The mechanism of tigecycline resistance in *Acinetobacter baumannii* revealed by proteomic and genomic analysis. *Int. J. Mol. Sci.* **2023**, *24*, 8652. <https://doi.org/10.3390/ijms24108652>.
81. Yu, M.; Zhao, Y. The posttranscriptional regulator CsrA affects multidrug resistance and biocontrol activity in *Lysobacter enzymogenes*. *J. Appl. Microbiol.* **2023**, *134*, lxad045. <https://doi.org/10.1093/jambio/lxad045>.
82. Li, J.; Gao, X.; Luo, T.; Wu, J.; Sun, G.; Liu, Q.; Jiang, Y.; Zhang, Y.; Mei, J.; Gao, Q. Association of gyrA/B mutations and resistance levels to fluoroquinolones in clinical isolates of *Mycobacterium tuberculosis*. *Emerg. Microbes. Infect.* **2014**, *3*, e19. <https://doi.org/10.1038/emi.2014.21>.
83. Ruiz, C.; Levy, S.B. Many chromosomal genes modulate MarA-mediated multidrug resistance in *Escherichia coli*. *Antimicrob. Agents. Chemother.* **2010**, *54*, 2125–2134. <https://doi.org/10.1128/aac.01420-09>.
84. Damas, M.S.F.; Ferreira, R.L.; Campanini, E.B.; Soares, G.G.; Campos, L.C.; Laprega, P.M.; Soares da Costa, A.; Freire, C.C.M.; Pitondo-Silva, A.; Cerdeira, L.T.; da Cunha, A.F.; Pranchevicius, M.D.S. Whole genome sequencing of the multidrug-resistant *Chryseobacterium indologenes* isolated from a patient in Brazil. *Front. Med.* **2022**, *9*, 931379. <https://doi.org/10.3389/fmed.2022.931379>.
85. Chan, B.K.; Wong, M.H.; Chan, E.W.; Chen, S. Transcriptional regulation and functional characterization of the plasmid-borne oqxAB genes in *Salmonella Typhimurium*. *Microbiol. Spectr.* **2022**, *10*, E0217021. <https://doi.org/10.1128/spectrum.02170-21>.
86. Heisig, P. Genetic evidence for a role of parC mutations in development of high-level fluoroquinolone resistance in *Escherichia coli*. *Antimicrob. Agents. Chemother.* **1996**, *40*, 879–885. <https://doi.org/10.1128/aac.40.4.879>.
87. Jia, Y.; Lu, H.; Zhu, L. Molecular mechanism of antibiotic resistance induced by mono- and twin-chained quaternary ammonium compounds. *Sci. Total. Environ.* **2022**, *832*, 155090. <https://doi.org/10.1016/j.scitotenv.2022.155090>.
88. Amusengeri, A.; Khan, A.; Tastan Bishop, Ö. The structural basis of *Mycobacterium tuberculosis* RpoB drug-resistant clinical mutations on rifampicin drug binding. *Molecules* **2022**, *27*, 885. <https://doi.org/10.3390/molecules27030885>.
89. Lei, C.; Kumar, S. *Yersinia pestis* antibiotic resistance: a systematic review. *Osong. Public. Health. Res. Perspect.* **2022**, *13*, 24–36. <https://doi.org/10.24171/j.phrp.2021.0288>.

90. Oueslati, W.; Ridha Rjeibi, M.; Benyedem, H.; Jebali, M.; Souissi, F.; Selmi, R.; El Asli, M.S.; Barguelli, F.; Ettriqui, A. Serotype occurrence, virulence profiles, antimicrobial resistance and molecular characterization of *Salmonella* isolated from hospitalized patients with gastroenteritis in Great Tunisia between 2010 and 2020. *Antibiotics* **2023**, *12*, 526. <https://doi.org/10.3390/antibiotics12030526>.
91. Venkatesan, M.; Fruci, M.; Verellen, L.A.; Skarina, T.; Mesa, N.; Flick, R.; Pham, C.; Mahadevan, R.; Stogios, P.J.; Savchenko, A. Molecular mechanism of plasmid-borne resistance to sulfonamide antibiotics. *Nat. Commun.* **2023**, *14*, 4031. <https://doi.org/10.1038/s41467-023-39778-7>.
92. Shimada, T.; Yamamoto, K.; Ishihama, A. Involvement of the leucine response transcription factor LeuO in regulation of the genes for sulfa drug efflux. *J. Bacteriol.* **2009**, *191*, 4562–4571. <https://doi.org/10.1128/jb.00108-09>.
93. Li, J.; Li, L.; Li, Q.; Fang, W.; Sun, Y.; Lu, Y.; Wang, J.; Zhu, Y.; Zhang, Y. Distribution and relationship of antibiotics, heavy metals and resistance genes in the upstream of Hanjiang River Basin in Shiyan, China. *Environ. Geochem. Health.* **2023**, *45*, 7115–7130. <https://doi.org/10.1007/s10653-023-01683-9>.
94. Bertram, R.; Neumann, B.; Schuster, C.F. Status quo of tet regulation in bacteria. *Microb. Biotechnol.* **2022**, *15*, 1101–1119. <https://doi.org/10.1111/1751-7915.13926>.
95. Xu, Q.; Sheng, Z.; Hao, M.; Jiang, J.; Ye, M.; Chen, Y.; Xu, X.; Guo, Q.; Wang, M. RamA upregulates multidrug resistance efflux pumps AcrAB and OqxAB in *Klebsiella pneumoniae*. *Int. J. Antimicrob. Agents.* **2021**, *57*, 106251. <https://doi.org/10.1016/j.ijantimicag.2020.106251>.
96. Li, Y.; Li, D.; Liang, Y.; Cui, J.; He, K.; He, D.; Liu, J.; Hu, G.; Yuan, L. Characterization of a tetracycline-resistant and bla(CTX-M)-bearing *Klebsiella pneumoniae* strain from a peacock in a Chinese zoo. *Appl. Environ. Microbiol.* **2023**, *89*, E0176422. <https://doi.org/10.1128/aem.01764-22>.
97. B, M.S.A.; D, L.P.A.C.; E, P.N.A.C.D.; F, H.N.; F, T.S.; F, T.S. Draft genome sequence of an mcr-1/IncI2-carrying multidrug-resistant *Escherichia coli* B1:ST101 isolated from meat and meat products in Egypt. *J. Glob. Antimicrob. Resist.* **2020**, *20*, 41–42. <https://doi.org/10.1016/j.jgar.2019.11.015>.
98. Nikaido, H.; Basina, M.; Nguyen, V.; Rosenberg, E.Y. Multidrug efflux pump AcrAB of *Salmonella typhimurium* excretes only those beta-lactam antibiotics containing lipophilic side chains. *J. Bacteriol.* **1998**, *180*, 4686. <https://doi.org/10.1128/JB.180.17.4686-4692.1998>.
99. Jiang, F.; Wu, Z.; Zheng, Y.; Frana, T.S.; Sahin, O.; Zhang, Q.; Li, G. Genotypes and antimicrobial susceptibility profiles of hemolytic *Escherichia coli* from diarrheic piglets. *Foodborne. Pathog. Dis.* **2019**, *16*, 94–103. <https://doi.org/10.1089/fpd.2018.2480>.
100. Mushtaq, S.; Vickers, A.; Ellaby, N.; Woodford, N.; Livermore, D.M. Selection and characterization of mutational resistance to aztreonam/avibactam in  $\beta$ -lactamase-producing *Enterobacterales*. *J. Antimicrob. Chemother.* **2021**, *77*, 98–111. <https://doi.org/10.1093/jac/dkab346>.
101. Granier, S.A.; Leflon-Guibout, V.; Goldstein, F.W.; Nicolas-Chanoine, M.H. New *Klebsiella oxytoca* beta-lactamase genes bla(OXY-3) and bla(OXY-4) and a third genetic group of *K. oxytoca* based on bla(OXY-3). *Antimicrob. Agents. Chemother.* **2003**, *47*, 2922–2928. <https://doi.org/10.1128/aac.47.9.2922-2928.2003>.
102. Oliveira, R.; Castro, J.; Silva, S.; Oliveira, H.; Saavedra, M.J.; Azevedo, N.F.; Almeida, C. Exploring the antibiotic resistance profile of clinical *Klebsiella pneumoniae* isolates in Portugal. *Antibiotics* **2022**, *11*, 1613. <https://doi.org/10.3390/antibiotics11111613>.
103. Martínez-Álvarez, S.; Châtre, P.; Cardona-Cabrera, T.; François, P.; Sánchez-Cano, A.; Höfle, U.; Zarazaga, M.; Madec, J.Y.; Haenni, M.; Torres, C. Detection and genetic characterization of bla(ESBL)-carrying plasmids of cloacal *Escherichia coli* isolates from white stork nestlings (*Ciconia ciconia*) in Spain. *J. Glob. Antimicrob. Resist.* **2023**, *34*, 186–194. <https://doi.org/10.1016/j.jgar.2023.07.011>.
104. Jing, W.; Liu, J.; Wu, S.; Li, X.; Liu, Y. Role of cpxA mutations in the resistance to aminoglycosides and  $\beta$ -lactams in *Salmonella enterica* serovar typhimurium. *Front. Microbiol.* **2021**, *12*, 604079. <https://doi.org/10.3389/fmicb.2021.604079>.
105. Rodrigues, I.C.; Rodrigues, S.C.; Duarte, F.V.; Costa, P.M.D.; Costa, P.M.D. The role of outer membrane proteins in UPEC antimicrobial resistance: a systematic review. *Membranes* **2022**, *12*, 981. <https://doi.org/10.3390/membranes12100981>.
106. Li, B.; Zhang, J.; Li, X. A comprehensive description of the TolC effect on the antimicrobial susceptibility profile in *Enterobacter bugandensis*. *Front. Cell. Infect. Microbiol.* **2022**, *12*, 1036933. <https://doi.org/10.3389/fcimb.2022.1036933>.
107. Vilela, F.P.; Rodrigues, D.D.P.; Allard, M.W.; Falcão, J.P. Prevalence of efflux pump and heavy metal tolerance encoding genes among *Salmonella enterica* serovar infantis strains from diverse sources in Brazil. *PloS One* **2022**, *17*, E0277979. <https://doi.org/10.1371/journal.pone.0277979>.
